# Supplementary material for: Microbiome analysis reveals the abundance of bacterial pathogens in Rousettus leschenaultii guano
Source: PubMed Central journal article supplement (PMC5109407; doi:10.1038/srep36948), 2016-11-15
Supplement: srep36948-s1.pdf [file srep36948-s1.pdf]

**Title: Microbiome analysis reveals the abundance of bacterial pathogens in  
*Rousettus leschenaultii* guano**

Sunil Banskar<sup>1</sup>, Shrikant S. Bhute<sup>2</sup>, Mangesh V. Suryavanshi<sup>1</sup>, Sachin Puneekar<sup>3</sup>, Yogesh S. Shouche<sup>1\*</sup>

**Author Affiliations:**

<sup>1</sup> Microbial Culture Collection, National Centre for Cell Science, Pune, India.

<sup>2</sup> Department of Zoology, Savitribai Phule Pune University, Pune, India.

<sup>3</sup> Biosphere, Eshwari, 52/403, Lakshminagar, Parvati, Pune-411009 (Maharashtra), India.

\* Correspondence:

**Dr. Yogesh S. Shouche**

Microbial Culture Collection

National Centre for Cell Science,

Central Tower, Sai Trinity Building Garware Circle,

Sutarwadi, Pashan Pune, Maharashtra 411021, India

Fax No: +91-20-25329001

Telephone No: +91-20-25329000

Email: [yogesh@nccs.res.in](mailto:yogesh@nccs.res.in)

| Sr. No. | Sample Id | Identification                 | Query cover | Identity |
|---------|-----------|--------------------------------|-------------|----------|
| 1       | G3_AK4    | <i>Escherichia coli</i>        | 100%        | 99%      |
| 2       | G3_AK5    | <i>Escherichia coli</i>        | 100%        | 100%     |
| 3       | G3_AK6    | <i>Escherichia coli</i>        | 100%        | 99%      |
| 4       | G3_AK7    | <i>Escherichia coli</i>        | 100%        | 100%     |
| 5       | G3_AK10   | <i>Escherichia coli</i>        | 100%        | 99%      |
| 6       | G3_AK11   | <i>Escherichia coli</i>        | 100%        | 99%      |
| 7       | G3_AK12   | <i>Escherichia coli</i>        | 100%        | 100%     |
| 8       | G3_AK13   | <i>Escherichia coli</i>        | 100%        | 99%      |
| 9       | G3_AK14   | <i>Escherichia coli</i>        | 99%         | 99%      |
| 10      | G3_AK15   | <i>Escherichia coli</i>        | 100%        | 99%      |
| 11      | G3_AK16   | <i>Escherichia coli</i>        | 99%         | 99%      |
| 12      | G3_AK18   | <i>Escherichia coli</i>        | 100%        | 99%      |
| 13      | G3_AK19   | <i>Escherichia coli</i>        | 99%         | 99%      |
| 14      | G3_AK21   | <i>Escherichia coli</i>        | 100%        | 100%     |
| 15      | G7_AK3    | <i>Staphylococcus cohnii</i>   | 100%        | 99%      |
| 16      | G7_AK4    | <i>Comamonas testosteroni</i>  | 100%        | 99%      |
| 17      | G7_AK8    | <i>Enterococcus hirae</i>      | 100%        | 99%      |
| 18      | G7_AK9    | <i>Comamonas testosteroni</i>  | 100%        | 99%      |
| 19      | G7_AK10   | <i>Lactococcus garvieae</i>    | 100%        | 99%      |
| 20      | G7_AK15   | <i>Enterobacter cloacae</i>    | 100%        | 99%      |
| 21      | G7_AK17   | <i>Citrobacter murliniae</i>   | 100%        | 99%      |
| 22      | G7_AK19   | <i>Staphylococcus cohnii</i>   | 100%        | 99%      |
| 23      | G7_AK20   | <i>Acinetobacter johnsonii</i> | 100%        | 98%      |
| 24      | G7_AK21   | <i>Hafnia alvei</i>            | 100%        | 100%     |
| 25      | G8_AK2    | <i>Lactococcus garvieae</i>    | 100%        | 100%     |
| 26      | G8_AK3    | <i>Lactococcus garvieae</i>    | 100%        | 100%     |
| 27      | G8_AK4    | <i>Escherichia coli</i>        | 100%        | 99%      |
| 28      | G8_AK5    | <i>Lactococcus garvieae</i>    | 100%        | 99%      |
| 29      | G8_AK6    | <i>Lactococcus garvieae</i>    | 99%         | 99%      |
| 30      | G8_AK7    | <i>Lactococcus garvieae</i>    | 99%         | 100%     |
| 31      | G8_AK9    | <i>Lactococcus garvieae</i>    | 100%        | 99%      |
| 32      | G8_AK11   | <i>Citrobacter koseri</i>      | 99%         | 99%      |
| 33      | G8_AK12   | <i>Escherichia coli</i>        | 100%        | 99%      |
| 34      | G8_AK13   | <i>Escherichia coli</i>        | 100%        | 99%      |
| 35      | G8_AK14   | <i>Citrobacter freundii</i>    | 100%        | 99%      |
| 36      | G8_AK15   | <i>Lactococcus garvieae</i>    | 100%        | 99%      |
| 37      | G8_AK16   | <i>Lactococcus garvieae</i>    | 100%        | 99%      |
| 38      | G8_AK19   | <i>Lactococcus garvieae</i>    | 100%        | 100%     |
| 39      | G8_AK20   | <i>Citrobacter koseri</i>      | 100%        | 99%      |
| 40      | G9_AK1    | <i>Citrobacter koseri</i>      | 100%        | 99%      |
| 41      | G9_AK2    | <i>Enterococcus hirae</i>      | 100%        | 99%      |
| 42      | G9_AK3    | <i>Klebsiella oxytoca</i>      | 100%        | 99%      |
| 43      | G9_AK4    | <i>Klebsiella oxytoca</i>      | 100%        | 99%      |
| 44      | G9_AK6    | <i>Enterococcus hirae</i>      | 99%         | 99%      |
| 45      | G9_AK7    | <i>Citrobacter koseri</i>      | 100%        | 99%      |
| 46      | G9_AK14   | <i>Enterococcus hirae</i>      | 100%        | 99%      |

|    |          |                                  |      |      |
|----|----------|----------------------------------|------|------|
| 47 | G9_AK16  | <i>Enterococcus hirae</i>        | 100% | 99%  |
| 48 | G9_AK17  | <i>Citrobacter koseri</i>        | 100% | 99%  |
| 49 | G15_AK2  | <i>Myroides odoratimimus</i>     | 100% | 100% |
| 50 | G15_AK4  | <i>Proteus hauseri</i>           | 100% | 99%  |
| 51 | G15_AK6  | <i>Providencia alcalifaciens</i> | 100% | 99%  |
| 52 | G15_AK7  | <i>Sphingobacterium sp.</i>      | 100% | 99%  |
| 53 | G15_AK9  | <i>Aeromonas hydrophila</i>      | 99%  | 99%  |
| 54 | G15_AK10 | <i>Comamonas testosteroni</i>    | 99%  | 99%  |
| 55 | G15_AK13 | <i>Staphylococcus kloosii</i>    | 99%  | 99%  |
| 56 | G15_AK15 | <i>Comamonas testosteroni</i>    | 99%  | 99%  |
| 57 | G15_AK20 | <i>Klebsiella oxytoca</i>        | 100% | 99%  |
| 58 | G17A_1   | <i>Lactococcus garvieae</i>      | 100% | 100% |
| 59 | G17A_2   | <i>Lactococcus garvieae</i>      | 100% | 99%  |
| 60 | G17A_3   | <i>Lactococcus garvieae</i>      | 100% | 99%  |
| 61 | G17A_5   | <i>Lactococcus garvieae</i>      | 100% | 99%  |
| 62 | G17A_7   | <i>Serratia marcescens</i>       | 100% | 99%  |
| 63 | G17A_8   | <i>Serratia marcescens</i>       | 100% | 99%  |
| 64 | G17A_9   | <i>Serratia ureilytica</i>       | 100% | 99%  |
| 65 | G17A_10  | <i>Serratia marcescens</i>       | 99%  | 99%  |
| 66 | G17A_11  | <i>Serratia marcescens</i>       | 100% | 99%  |
| 67 | G17A_12  | <i>Serratia marcescens</i>       | 100% | 99%  |
| 68 | G17A_14  | <i>Lactococcus garvieae</i>      | 100% | 99%  |
| 69 | G17A_15  | <i>Lactococcus garvieae</i>      | 100% | 100% |
| 70 | G17A_19  | <i>Klebsiella oxytoca</i>        | 100% | 99%  |
| 71 | G17A_20  | <i>Lactococcus garvieae</i>      | 100% | 99%  |
| 72 | G19A_3   | <i>Kluyvera ascorbata</i>        | 100% | 99%  |
| 73 | G19A_5   | <i>Enterobacter cloacae</i>      | 100% | 99%  |
| 74 | G19A_7   | <i>Acinetobacter gernerii</i>    | 100% | 100% |
| 75 | G19A_15  | <i>Citrobacter freundii</i>      | 100% | 99%  |
| 76 | G19A_17  | <i>Comamonas jiangduensis</i>    | 100% | 98%  |
| 77 | G19A_18  | <i>Enterobacter cloacae</i>      | 99%  | 99%  |
| 78 | G19A_19  | <i>Kluyvera intermedia</i>       | 100% | 99%  |
| 79 | G19A_20  | <i>Citrobacter freundii</i>      | 99%  | 99%  |
| 80 | G25A_6   | <i>Staphylococcus lentus</i>     | 100% | 99%  |
| 81 | G25A_7   | <i>Staphylococcus lentus</i>     | 100% | 99%  |
| 82 | G25A_10  | <i>Lactococcus garvieae</i>      | 100% | 99%  |
| 83 | G25A_11  | <i>Citrobacter amalonaticus</i>  | 99%  | 99%  |
| 84 | G26A_1   | <i>Lactococcus garvieae</i>      | 100% | 99%  |
| 85 | G26A_2   | <i>Lactococcus garvieae</i>      | 99%  | 99%  |
| 86 | G26A_3   | <i>Enterobacter cloacae</i>      | 99%  | 100% |
| 87 | G26A_5   | <i>Lactococcus garvieae</i>      | 100% | 99%  |
| 88 | G26A_6   | <i>Lactococcus garvieae</i>      | 100% | 99%  |
| 89 | G26A_8   | <i>Lactococcus garvieae</i>      | 100% | 100% |
| 90 | G26A_9   | <i>Lactococcus garvieae</i>      | 98%  | 100% |
| 91 | G26A_10  | <i>Lactococcus garvieae</i>      | 100% | 100% |
| 92 | G26A_11  | <i>Lactococcus garvieae</i>      | 99%  | 99%  |
| 93 | G26A_13  | <i>Lactococcus garvieae</i>      | 99%  | 99%  |

|     |         |                                       |      |      |
|-----|---------|---------------------------------------|------|------|
| 94  | G26A_14 | <i>Enterobacter cloacae</i>           | 100% | 99%  |
| 95  | G26A_15 | <i>Lactococcus garvieae</i>           | 99%  | 99%  |
| 96  | G26A_16 | <i>Lactococcus garvieae</i>           | 99%  | 99%  |
| 97  | G26A_17 | <i>Lactococcus garvieae</i>           | 99%  | 99%  |
| 98  | G26A_18 | <i>Enterobacter cloacae</i>           | 100% | 100% |
| 99  | G26A_20 | <i>Lactococcus garvieae</i>           | 100% | 100% |
| 100 | G26A_21 | <i>Lactococcus garvieae</i>           | 100% | 99%  |
| 101 | G28A_1  | <i>Raoultella ornithinolytica</i>     | 99%  | 99%  |
| 102 | G28A_2  | <i>Lactococcus garvieae</i>           | 100% | 100% |
| 103 | G28A_3  | <i>Enterococcus faecalis</i>          | 100% | 99%  |
| 104 | G28A_4  | <i>Enterococcus hirae</i>             | 100% | 99%  |
| 105 | G28A_5  | <i>Enterococcus hirae</i>             | 100% | 99%  |
| 106 | G28A_6  | <i>Enterococcus hirae</i>             | 100% | 99%  |
| 107 | G28A_7  | <i>Enterococcus hirae</i>             | 100% | 99%  |
| 108 | G28A_11 | <i>Raoultella ornithinolytica</i>     | 100% | 99%  |
| 109 | G28A_13 | <i>Enterococcus faecalis</i>          | 100% | 99%  |
| 110 | G28A_14 | <i>Lactococcus garvieae</i>           | 99%  | 99%  |
| 111 | G28A_18 | <i>Enterococcus hirae</i>             | 99%  | 99%  |
| 112 | G28A_19 | <i>Enterococcus hirae</i>             | 100% | 99%  |
| 113 | G28A_20 | <i>Enterococcus hirae</i>             | 99%  | 99%  |
| 114 | G28A_21 | <i>Raoultella ornithinolytica</i>     | 100% | 99%  |
| 115 | G30A_2  | <i>Lactococcus garvieae</i>           | 99%  | 99%  |
| 116 | G30A_4  | <i>Lactococcus garvieae</i>           | 100% | 99%  |
| 117 | G30A_5  | <i>Lactococcus garvieae</i>           | 100% | 100% |
| 118 | G30A_6  | <i>Serratia marcescens</i>            | 100% | 99%  |
| 119 | G30A_7  | <i>Lactococcus garvieae</i>           | 100% | 99%  |
| 120 | G30A_8  | <i>Enterococcus faecalis</i>          | 100% | 99%  |
| 121 | G30A_9  | <i>Raoultella planticola</i>          | 100% | 99%  |
| 122 | G30A_13 | <i>Lactococcus garvieae</i>           | 100% | 99%  |
| 123 | G31A_1  | <i>Enterobacter hormaechei</i>        | 100% | 99%  |
| 124 | G31A_2  | <i>Lactococcus garvieae</i>           | 99%  | 100% |
| 125 | G31A_3  | <i>Lactococcus garvieae</i>           | 100% | 100% |
| 126 | G31A_4  | <i>Lactococcus garvieae</i>           | 100% | 100% |
| 127 | G31A_9  | <i>Citrobacter freundii</i>           | 99%  | 99%  |
| 128 | G31A_13 | <i>Lactococcus garvieae</i>           | 100% | 100% |
| 129 | G31A_14 | <i>Citrobacter freundii</i>           | 100% | 99%  |
| 130 | G31A_16 | <i>Lactococcus garvieae</i>           | 99%  | 100% |
| 131 | G31A_18 | <i>Lactococcus garvieae</i>           | 99%  | 100% |
| 132 | G31A_19 | <i>Lactococcus garvieae</i>           | 100% | 100% |
| 133 | G31A_21 | <i>Brachybacterium tyrofermentans</i> | 99%  | 99%  |
| 134 | BCSA_1  | <i>Staphylococcus lentus</i>          | 100% | 99%  |
| 135 | BCSA_2  | <i>Staphylococcus lentus</i>          | 100% | 99%  |
| 136 | BCSA_3  | <i>Staphylococcus cohnii</i>          | 100% | 99%  |
| 137 | BCSA_4  | <i>Staphylococcus nepalensis</i>      | 99%  | 99%  |
| 138 | BCSA_5  | <i>Staphylococcus cohnii</i>          | 100% | 100% |
| 139 | BCSA_6  | <i>Staphylococcus saprophyticus</i>   | 100% | 99%  |
| 140 | BCSA_7  | <i>Staphylococcus saprophyticus</i>   | 99%  | 99%  |

|     |         |                                     |      |      |
|-----|---------|-------------------------------------|------|------|
| 141 | BCSA_8  | <i>Staphylococcus lentus</i>        | 100% | 99%  |
| 142 | BCSA_9  | <i>Staphylococcus nepalensis</i>    | 100% | 99%  |
| 143 | BCSA_11 | <i>Staphylococcus aureus</i>        | 99%  | 99%  |
| 144 | BCSA_12 | <i>Staphylococcus cohnii</i>        | 99%  | 98%  |
| 145 | BCSA_14 | <i>Staphylococcus nepalensis</i>    | 99%  | 99%  |
| 146 | BCSA_16 | <i>Staphylococcus cohnii</i>        | 99%  | 99%  |
| 147 | BCSA_17 | <i>Staphylococcus saprophyticus</i> | 100% | 99%  |
| 148 | BCSA_18 | <i>Staphylococcus saprophyticus</i> | 99%  | 99%  |
| 149 | BCSA_19 | <i>Staphylococcus nepalensis</i>    | 100% | 99%  |
| 150 | BCSA_20 | <i>Staphylococcus nepalensis</i>    | 99%  | 99%  |
| 151 | BCSA_21 | <i>Staphylococcus nepalensis</i>    | 100% | 99%  |
| 152 | CGSA_1  | <i>Staphylococcus sciuri</i>        | 99%  | 99%  |
| 153 | CGSA_2  | <i>Staphylococcus sciuri</i>        | 99%  | 99%  |
| 154 | CGSA_3  | <i>Staphylococcus sciuri</i>        | 99%  | 99%  |
| 155 | CGSA_4  | <i>Staphylococcus sciuri</i>        | 99%  | 99%  |
| 156 | CGSA_5  | <i>Staphylococcus sciuri</i>        | 99%  | 99%  |
| 157 | CGSA_7  | <i>Staphylococcus sciuri</i>        | 100% | 99%  |
| 158 | CGSA_9  | <i>Staphylococcus sciuri</i>        | 99%  | 99%  |
| 159 | CGSA_11 | <i>Citrobacter koseri</i>           | 99%  | 99%  |
| 160 | CGSA_12 | <i>Staphylococcus sciuri</i>        | 100% | 99%  |
| 161 | CGSA_13 | <i>Staphylococcus sciuri</i>        | 100% | 99%  |
| 162 | CGSA_16 | <i>Staphylococcus sciuri</i>        | 99%  | 99%  |
| 163 | CGSA_17 | <i>Staphylococcus sciuri</i>        | 99%  | 99%  |
| 164 | CGSA_18 | <i>Staphylococcus sciuri</i>        | 99%  | 99%  |
| 165 | CGSA_19 | <i>Staphylococcus sciuri</i>        | 99%  | 99%  |
| 166 | CGSA_20 | <i>Staphylococcus sciuri</i>        | 100% | 99%  |
| 167 | CGSA_21 | <i>Staphylococcus sciuri</i>        | 99%  | 99%  |
| 168 | G2_LA1  | <i>Myroides phaeus</i>              | 99%  | 96%  |
| 169 | G2_LA2  | <i>Myroides phaeus</i>              | 100% | 96%  |
| 170 | G2_LA4  | <i>Acinetobacter sp.</i>            | 99%  | 98%  |
| 171 | G2_LA5  | <i>Acinetobacter sp.</i>            | 99%  | 98%  |
| 172 | G2_LA6  | <i>Acinetobacter gandensis</i>      | 99%  | 98%  |
| 173 | G2_LA7  | <i>Acinetobacter bouvetii</i>       | 99%  | 98%  |
| 174 | G2_LA8  | <i>Acinetobacter sp.</i>            | 99%  | 99%  |
| 175 | G2_LA9  | <i>Comamonas sp.</i>                | 99%  | 99%  |
| 176 | G2_LA10 | <i>Acinetobacter tjernbergiae</i>   | 100% | 99%  |
| 177 | G2_LA11 | <i>Kurthia gibsonii</i>             | 100% | 99%  |
| 178 | G2_LA12 | <i>Acinetobacter gandensis</i>      | 99%  | 98%  |
| 179 | G2_LA15 | <i>Kurthia gibsonii</i>             | 99%  | 99%  |
| 180 | G2_LA16 | <i>Kurthia gibsonii</i>             | 100% | 99%  |
| 181 | G2_LA17 | <i>Acinetobacter sp.</i>            | 100% | 98%  |
| 182 | G2_LA18 | <i>Enterobacter sp.</i>             | 100% | 99%  |
| 183 | G2_LA19 | <i>Enterobacter sp.</i>             | 100% | 100% |
| 184 | G2_LA20 | <i>Kurthia gibsonii</i>             | 99%  | 99%  |
| 185 | G2_LA21 | <i>Bacillus pumilus</i>             | 100% | 99%  |
| 186 | G3_LA2  | <i>Escherichia coli</i>             | 100% | 99%  |
| 187 | G3_LA3  | <i>Escherichia coli</i>             | 100% | 100% |

|     |         |                               |      |      |
|-----|---------|-------------------------------|------|------|
| 188 | G3_LA4  | <i>Escherichia coli</i>       | 100% | 100% |
| 189 | G3_LA5  | <i>Kurthia gibsonii</i>       | 100% | 99%  |
| 190 | G3_LA6  | <i>Escherichia coli</i>       | 100% | 100% |
| 191 | G3_LA7  | <i>Escherichia coli</i>       | 100% | 100% |
| 192 | G3_LA8  | <i>Escherichia coli</i>       | 100% | 100% |
| 193 | G3_LA9  | <i>Escherichia coli</i>       | 100% | 100% |
| 194 | G3_LA10 | <i>Escherichia coli</i>       | 100% | 100% |
| 195 | G3_LA11 | <i>Escherichia coli</i>       | 100% | 99%  |
| 196 | G3_LA12 | <i>Escherichia coli</i>       | 100% | 100% |
| 197 | G3_LA13 | <i>Escherichia coli</i>       | 100% | 100% |
| 198 | G3_LA14 | <i>Kurthia gibsonii</i>       | 100% | 99%  |
| 199 | G3_LA15 | <i>Kurthia gibsonii</i>       | 100% | 99%  |
| 200 | G3_LA17 | <i>Providencia rettgeri</i>   | 100% | 99%  |
| 201 | G3_LA18 | <i>Escherichia coli</i>       | 100% | 100% |
| 202 | G3_LA19 | <i>Escherichia coli</i>       | 100% | 100% |
| 203 | G3_LA20 | <i>Escherichia coli</i>       | 100% | 100% |
| 204 | G3_LA21 | <i>Escherichia coli</i>       | 100% | 100% |
| 205 | G6_LA1  | <i>Enterococcus hirae</i>     | 100% | 99%  |
| 206 | G6_LA2  | <i>Enterococcus hirae</i>     | 100% | 99%  |
| 207 | G6_LA3  | <i>Enterococcus hirae</i>     | 100% | 99%  |
| 208 | G6_LA4  | <i>Enterococcus hirae</i>     | 100% | 99%  |
| 209 | G6_LA5  | <i>Enterococcus hirae</i>     | 100% | 99%  |
| 210 | G6_LA6  | <i>Enterococcus hirae</i>     | 100% | 99%  |
| 211 | G6_LA7  | <i>Enterococcus hirae</i>     | 100% | 99%  |
| 212 | G6_LA8  | <i>Enterococcus hirae</i>     | 100% | 99%  |
| 213 | G6_LA9  | <i>Enterococcus hirae</i>     | 100% | 99%  |
| 214 | G6_LA10 | <i>Enterococcus hirae</i>     | 100% | 99%  |
| 215 | G6_LA11 | <i>Enterococcus hirae</i>     | 100% | 99%  |
| 216 | G6_LA12 | <i>Enterococcus hirae</i>     | 100% | 99%  |
| 217 | G6_LA13 | <i>Enterococcus hirae</i>     | 100% | 99%  |
| 218 | G6_LA14 | <i>Enterococcus hirae</i>     | 100% | 99%  |
| 219 | G6_LA15 | <i>Enterococcus hirae</i>     | 100% | 99%  |
| 220 | G6_LA16 | <i>Weissella confusa</i>      | 99%  | 99%  |
| 221 | G6_LA17 | <i>Enterococcus hirae</i>     | 100% | 99%  |
| 222 | G6_LA18 | <i>Enterococcus hirae</i>     | 100% | 99%  |
| 223 | G6_LA21 | <i>Enterococcus hirae</i>     | 100% | 99%  |
| 224 | G7_LA1  | <i>Staphylococcus sciuri</i>  | 100% | 99%  |
| 225 | G7_LA2  | <i>Enterobacter cloacae</i>   | 100% | 99%  |
| 226 | G7_LA3  | <i>Enterobacter cloacae</i>   | 100% | 99%  |
| 227 | G7_LA4  | <i>Enterobacter cloacae</i>   | 100% | 99%  |
| 228 | G7_LA5  | <i>Acinetobacter bouvetii</i> | 99%  | 97%  |
| 229 | G7_LA6  | <i>Enterobacter cloacae</i>   | 100% | 99%  |
| 230 | G7_LA7  | <i>Enterobacter cloacae</i>   | 100% | 99%  |
| 231 | G7_LA9  | <i>Enterobacter cloacae</i>   | 100% | 99%  |
| 232 | G7_LA10 | <i>Arthrobacter sp.</i>       | 100% | 99%  |
| 233 | G7_LA11 | <i>Enterobacter cloacae</i>   | 100% | 99%  |
| 234 | G7_LA13 | <i>Enterobacter cloacae</i>   | 100% | 99%  |

|     |           |                                   |      |      |
|-----|-----------|-----------------------------------|------|------|
| 235 | G7_LA14   | <i>Arthrobacter protophormiae</i> | 100% | 99%  |
| 236 | G7_LA15   | <i>Staphylococcus cohnii</i>      | 99%  | 99%  |
| 237 | G7_LA16   | <i>Arthrobacter sp.</i>           | 100% | 99%  |
| 238 | G7_LA17   | <i>Enterobacter cloacae</i>       | 100% | 99%  |
| 239 | G7_LA18   | <i>Enterococcus faecalis</i>      | 100% | 99%  |
| 240 | G7_LA19   | <i>Escherichia coli</i>           | 100% | 99%  |
| 241 | G7_LA20   | <i>Citrobacter farmeri</i>        | 100% | 99%  |
| 242 | G7_LA21   | <i>Enterobacter cloacae</i>       | 100% | 99%  |
| 243 | G8_LA1    | <i>Staphylococcus lentus</i>      | 99%  | 99%  |
| 244 | G8_LA2    | <i>Escherichia coli</i>           | 100% | 99%  |
| 245 | G8_LA3    | <i>Escherichia coli</i>           | 100% | 99%  |
| 246 | G8_LA4    | <i>Enterobacter sp.</i>           | 100% | 99%  |
| 247 | G8_LA5    | <i>Klebsiella oxytoca</i>         | 99%  | 99%  |
| 248 | G8_LA6    | <i>Escherichia coli</i>           | 99%  | 99%  |
| 249 | G8_LA7    | <i>Escherichia coli</i>           | 99%  | 99%  |
| 250 | G8_LA8    | <i>Escherichia coli</i>           | 100% | 99%  |
| 251 | G8_LA11   | <i>Escherichia coli</i>           | 100% | 99%  |
| 252 | G8_LA12   | <i>Enterobacter cloacae</i>       | 100% | 99%  |
| 253 | G8_LA13   | <i>Enterobacter sp.</i>           | 99%  | 99%  |
| 254 | G8_LA14   | <i>Enterobacter cloacae</i>       | 100% | 99%  |
| 255 | G9_LA1    | <i>Enterococcus sp.</i>           | 100% | 99%  |
| 256 | G9_LA2    | <i>Enterococcus sp.</i>           | 100% | 99%  |
| 257 | G9_LA4    | <i>Yokenella regensburgei</i>     | 100% | 100% |
| 258 | G9_LA5    | <i>Klebsiella sp.</i>             | 100% | 99%  |
| 259 | G9_LA6    | <i>Citrobacter koseri</i>         | 100% | 99%  |
| 260 | G9_LA7    | <i>Citrobacter koseri</i>         | 100% | 99%  |
| 261 | G9_LA8    | <i>Klebsiella sp.</i>             | 100% | 99%  |
| 262 | G9_LA9    | <i>Citrobacter koseri</i>         | 99%  | 99%  |
| 263 | G9_LA10   | <i>Citrobacter koseri</i>         | 100% | 99%  |
| 264 | G9_LA13   | <i>Enterococcus sp.</i>           | 100% | 99%  |
| 265 | G9_LA15   | <i>Enterobacter cloacae</i>       | 100% | 99%  |
| 266 | G15_LA1   | <i>Comamonas testosteroni</i>     | 100% | 98%  |
| 267 | G15_LA2   | <i>Sphingobacterium sp.</i>       | 100% | 99%  |
| 268 | G15_LA3   | <i>Comamonas sp.</i>              | 100% | 99%  |
| 269 | G15_LA4   | <i>Enterococcus sp.</i>           | 100% | 100% |
| 270 | G15_LA5   | <i>Enterococcus thailandicus</i>  | 100% | 99%  |
| 271 | G15_LA6   | <i>Enterococcus faecalis</i>      | 100% | 100% |
| 272 | G15_LA9   | <i>Escherichia coli</i>           | 100% | 100% |
| 273 | G15_LA11  | <i>Escherichia coli</i>           | 100% | 100% |
| 274 | G15_LA12  | <i>Acinetobacter haemolyticus</i> | 100% | 99%  |
| 275 | G15_LA13  | <i>Sphingobacterium sp.</i>       | 100% | 99%  |
| 276 | G15_LA15  | <i>Enterococcus sp.</i>           | 100% | 99%  |
| 277 | G15_LA16  | <i>Enterococcus sp.</i>           | 100% | 100% |
| 278 | G15_LA18  | <i>Wautersiella falsenii</i>      | 100% | 99%  |
| 279 | G15_LA20  | <i>Enterobacter cloacae</i>       | 100% | 99%  |
| 280 | G15_LA21  | <i>Brevibacterium iodinum</i>     | 99%  | 99%  |
| 281 | G15B_LA22 | <i>Sphingobacterium sp.</i>       | 100% | 97%  |

|     |           |                                   |      |      |
|-----|-----------|-----------------------------------|------|------|
| 282 | G15B_LA23 | <i>Enterococcus sp.</i>           | 100% | 100% |
| 283 | G15B_LA25 | <i>Comamonas sp.</i>              | 100% | 96%  |
| 284 | G15B_LA27 | <i>Pseudomonas sp.</i>            | 100% | 99%  |
| 285 | G15B_LA28 | <i>Pseudomonas sp.</i>            | 100% | 99%  |
| 286 | G15B_LA29 | <i>Comamonas sp.</i>              | 100% | 99%  |
| 287 | G15B_LA30 | <i>Sphingobacterium sp.</i>       | 100% | 99%  |
| 288 | G15B_LA31 | <i>Klebsiella pneumoniae</i>      | 100% | 99%  |
| 289 | G15B_LA32 | <i>Brevibacterium oceanii</i>     | 100% | 98%  |
| 290 | G15B_LA33 | <i>Brevibacterium oceanii</i>     | 98%  | 99%  |
| 291 | G17_LA1   | <i>Enterococcus faecalis</i>      | 100% | 99%  |
| 292 | G17_LA2   | <i>Weissella confusa</i>          | 100% | 100% |
| 293 | G17_LA3   | <i>Enterococcus faecalis</i>      | 100% | 99%  |
| 294 | G17_LA4   | <i>Serratia marcescens</i>        | 100% | 99%  |
| 295 | G17_LA5   | <i>Serratia sp.</i>               | 100% | 100% |
| 296 | G17_LA6   | <i>Weissella confusa</i>          | 100% | 99%  |
| 297 | G17_LA7   | <i>Staphylococcus lentus</i>      | 100% | 99%  |
| 298 | G17_LA8   | <i>Serratia sp.</i>               | 100% | 100% |
| 299 | G17_LA11  | <i>Citrobacter koseri</i>         | 100% | 99%  |
| 300 | G17_LA14  | <i>Serratia sp.</i>               | 100% | 99%  |
| 301 | G17_LA15  | <i>Tatumella ptyseos</i>          | 100% | 99%  |
| 302 | G17_LA16  | <i>Klebsiella sp.</i>             | 100% | 99%  |
| 303 | G17_LA17  | <i>Serratia sp.</i>               | 100% | 99%  |
| 304 | G17_LA18  | <i>Serratia sp.</i>               | 100% | 100% |
| 305 | G17_LA19  | <i>Serratia sp.</i>               | 100% | 100% |
| 306 | G17_LA20  | <i>Serratia sp.</i>               | 100% | 100% |
| 307 | G17_LA21  | <i>Serratia sp.</i>               | 100% | 100% |
| 308 | G19_LA1   | <i>Enterobacter ludwigii</i>      | 100% | 99%  |
| 309 | G19_LA2   | <i>Kurthia gibsonii</i>           | 100% | 99%  |
| 310 | G19_LA3   | <i>Acinetobacter haemolyticus</i> | 100% | 99%  |
| 311 | G19_LA4   | <i>Acinetobacter sp.</i>          | 100% | 99%  |
| 312 | G19_LA6   | <i>Myroides odoratimimus</i>      | 100% | 99%  |
| 313 | G19_LA7   | <i>Serratia sp.</i>               | 100% | 99%  |
| 314 | G19_LA8   | <i>Staphylococcus sciuri</i>      | 100% | 99%  |
| 315 | G19_LA9   | <i>Enterobacter ludwigii</i>      | 99%  | 99%  |
| 316 | G19_LA10  | <i>Serratia marcescens</i>        | 100% | 99%  |
| 317 | G19_LA11  | <i>Myroides odoratus</i>          | 100% | 99%  |
| 318 | G19_LA12  | <i>Kluyvera ascorbata</i>         | 100% | 99%  |
| 319 | G19_LA13  | <i>Enterobacter ludwigii</i>      | 99%  | 99%  |
| 320 | G19_LA14  | <i>Myroides marinus</i>           | 100% | 99%  |
| 321 | G19_LA16  | <i>Kurthia gibsonii</i>           | 100% | 99%  |
| 322 | G19_LA17  | <i>Enterococcus faecalis</i>      | 100% | 99%  |
| 323 | G19_LA18  | <i>Serratia sp.</i>               | 100% | 99%  |
| 324 | G19_LA21  | <i>Serratia rubidaea</i>          | 99%  | 99%  |
| 325 | G20_LA1   | <i>Weissella confusa</i>          | 100% | 99%  |
| 326 | G20_LA2   | <i>Weissella confusa</i>          | 100% | 99%  |
| 327 | G20_LA3   | <i>Weissella confusa</i>          | 99%  | 99%  |
| 328 | G20_LA4   | <i>Weissella confusa</i>          | 100% | 99%  |



|     |           |                               |      |      |
|-----|-----------|-------------------------------|------|------|
| 329 | G20_LA5   | <i>Weissella confusa</i>      | 100% | 99%  |
| 330 | G20_LA6   | <i>Weissella confusa</i>      | 99%  | 99%  |
| 331 | G20_LA7   | <i>Weissella confusa</i>      | 100% | 99%  |
| 332 | G20_LA8   | <i>Weissella confusa</i>      | 100% | 99%  |
| 333 | G20_LA9   | <i>Weissella confusa</i>      | 99%  | 99%  |
| 334 | G20_LA11  | <i>Weissella confusa</i>      | 100% | 99%  |
| 335 | G20_LA13  | <i>Weissella confusa</i>      | 99%  | 99%  |
| 336 | G20_LA14  | <i>Lactococcus lactis</i>     | 100% | 99%  |
| 337 | G20_LA15  | <i>Weissella confusa</i>      | 100% | 99%  |
| 338 | G20_LA17  | <i>Weissella confusa</i>      | 100% | 99%  |
| 339 | G20_LA20  | <i>Weissella confusa</i>      | 100% | 99%  |
| 340 | G20_LA21  | <i>Weissella confusa</i>      | 99%  | 99%  |
| 341 | G20B_LA22 | <i>Weissella confusa</i>      | 100% | 99%  |
| 342 | G20B_LA23 | <i>Microbacterium sp.</i>     | 99%  | 99%  |
| 343 | G20B_LA25 | <i>Weissella confusa</i>      | 99%  | 99%  |
| 344 | G20B_LA26 | <i>Microbacterium sp.</i>     | 99%  | 99%  |
| 345 | G20B_LA28 | <i>Microbacterium sp.</i>     | 100% | 99%  |
| 346 | G20B_LA29 | <i>Microbacterium sp.</i>     | 100% | 99%  |
| 347 | G20B_LA30 | <i>Weissella confusa</i>      | 100% | 99%  |
| 348 | G20B_LA31 | <i>Weissella confusa</i>      | 100% | 99%  |
| 349 | G20B_LA32 | <i>Weissella confusa</i>      | 99%  | 99%  |
| 350 | G20B_LA33 | <i>Weissella confusa</i>      | 100% | 99%  |
| 351 | G20B_LA34 | <i>Weissella confusa</i>      | 100% | 99%  |
| 352 | G20B_LA35 | <i>Weissella confusa</i>      | 100% | 99%  |
| 353 | G20B_LA38 | <i>Microbacterium sp.</i>     | 99%  | 99%  |
| 354 | G20B_LA39 | <i>Microbacterium sp.</i>     | 100% | 99%  |
| 355 | G20B_LA40 | <i>Weissella confusa</i>      | 100% | 99%  |
| 356 | G20B_LA41 | <i>Lactococcus lactis</i>     | 100% | 99%  |
| 357 | G20B_LA42 | <i>Weissella confusa</i>      | 100% | 99%  |
| 358 | G21_LA2   | <i>Escherichia coli</i>       | 100% | 100% |
| 359 | G21_LA3   | <i>Escherichia coli</i>       | 100% | 99%  |
| 360 | G21_LA4   | <i>Escherichia coli</i>       | 100% | 99%  |
| 361 | G21_LA5   | <i>Klebsiella sp.</i>         | 100% | 99%  |
| 362 | G21_LA7   | <i>Escherichia coli</i>       | 100% | 100% |
| 363 | G21_LA8   | <i>Escherichia coli</i>       | 100% | 99%  |
| 364 | G21_LA9   | <i>Escherichia coli</i>       | 100% | 99%  |
| 365 | G21_LA11  | <i>Escherichia coli</i>       | 100% | 99%  |
| 366 | G21_LA12  | <i>Escherichia coli</i>       | 100% | 99%  |
| 367 | G21_LA13  | <i>Escherichia coli</i>       | 100% | 99%  |
| 368 | G21_LA15  | <i>Escherichia fergusonii</i> | 99%  | 99%  |
| 369 | G21_LA16  | <i>Escherichia fergusonii</i> | 100% | 99%  |
| 370 | G21_LA17  | <i>Escherichia coli</i>       | 100% | 100% |
| 371 | G21_LA18  | <i>Escherichia coli</i>       | 100% | 99%  |
| 372 | G21_LA19  | <i>Escherichia coli</i>       | 100% | 100% |
| 373 | G21_LA20  | <i>Escherichia coli</i>       | 100% | 99%  |
| 374 | G21_LA21  | <i>Escherichia coli</i>       | 100% | 99%  |
| 375 | G23_LA7   | <i>Enterobacter cloacae</i>   | 100% | 99%  |

|     |           |                                     |      |      |
|-----|-----------|-------------------------------------|------|------|
| 376 | G23_LA8   | <i>Citrobacter koseri</i>           | 99%  | 99%  |
| 377 | G23_LA9   | <i>Citrobacter koseri</i>           | 100% | 99%  |
| 378 | G23_LA10  | <i>Citrobacter koseri</i>           | 99%  | 99%  |
| 379 | G23_LA11  | <i>Staphylococcus saprophyticus</i> | 100% | 99%  |
| 380 | G23_LA12  | <i>Citrobacter freundii</i>         | 100% | 99%  |
| 381 | G23_LA13  | <i>Citrobacter koseri</i>           | 99%  | 99%  |
| 382 | G23_LA14  | <i>Yokenella regensburgei</i>       | 99%  | 100% |
| 383 | G23_LA15  | <i>Citrobacter freundii</i>         | 100% | 99%  |
| 384 | G23_LA16  | <i>Enterobacter sp.</i>             | 100% | 99%  |
| 385 | G23_LA17  | <i>Citrobacter koseri</i>           | 100% | 99%  |
| 386 | G23_LA19  | <i>Citrobacter koseri</i>           | 100% | 99%  |
| 387 | G23_LA20  | <i>Citrobacter sp.</i>              | 100% | 99%  |
| 388 | G23_LA21  | <i>Klebsiella sp.</i>               | 100% | 99%  |
| 389 | G25_LA1   | <i>Staphylococcus lentus</i>        | 100% | 99%  |
| 390 | G25_LA2   | <i>Staphylococcus lentus</i>        | 100% | 99%  |
| 391 | G25_LA3   | <i>Bacillus altitudinis</i>         | 99%  | 99%  |
| 392 | G25_LA4   | <i>Enterococcus hirae</i>           | 100% | 99%  |
| 393 | G25_LA6   | <i>Bacillus cereus</i>              | 100% | 99%  |
| 394 | G25_LA7   | <i>Bacillus megaterium</i>          | 99%  | 99%  |
| 395 | G25_LA8   | <i>Staphylococcus lentus</i>        | 99%  | 99%  |
| 396 | G25_LA9   | <i>Staphylococcus lentus</i>        | 100% | 99%  |
| 397 | G25_LA10  | <i>Staphylococcus lentus</i>        | 100% | 99%  |
| 398 | G25_LA12  | <i>Enterococcus faecalis</i>        | 100% | 99%  |
| 399 | G25_LA13  | <i>Staphylococcus cohnii</i>        | 99%  | 99%  |
| 400 | G25_LA14  | <i>Staphylococcus cohnii</i>        | 100% | 99%  |
| 401 | G25_LA15  | <i>Staphylococcus lentus</i>        | 99%  | 99%  |
| 402 | G25_LA16  | <i>Bacillus sp.</i>                 | 99%  | 99%  |
| 403 | G25_LA17  | <i>Staphylococcus lentus</i>        | 99%  | 99%  |
| 404 | G25_LA18  | <i>Staphylococcus lentus</i>        | 100% | 99%  |
| 405 | G25_LA20  | <i>Staphylococcus saprophyticus</i> | 100% | 99%  |
| 406 | G25_LA21  | <i>Staphylococcus lentus</i>        | 99%  | 99%  |
| 407 | G25B_LA22 | <i>Enterococcus hirae</i>           | 100% | 99%  |
| 408 | G25B_LA23 | <i>Staphylococcus lentus</i>        | 99%  | 99%  |
| 409 | G25B_LA25 | <i>Staphylococcus lentus</i>        | 99%  | 99%  |
| 410 | G25B_LA26 | <i>Staphylococcus sp.</i>           | 100% | 99%  |
| 411 | G26_LA3   | <i>Enterobacter cloacae</i>         | 100% | 100% |
| 412 | G26_LA4   | <i>Enterobacter cloacae</i>         | 100% | 99%  |
| 413 | G26_LA5   | <i>Enterobacter cloacae</i>         | 100% | 99%  |
| 414 | G26_LA6   | <i>Enterobacter cloacae</i>         | 100% | 99%  |
| 415 | G26_LA7   | <i>Enterobacter cloacae</i>         | 100% | 100% |
| 416 | G26_LA8   | <i>Enterobacter cloacae</i>         | 100% | 100% |
| 417 | G26_LA9   | <i>Enterobacter cloacae</i>         | 100% | 99%  |
| 418 | G26_LA11  | <i>Enterobacter cloacae</i>         | 100% | 99%  |
| 419 | G26_LA12  | <i>Enterobacter cloacae</i>         | 100% | 100% |
| 420 | G26_LA13  | <i>Enterobacter cloacae</i>         | 100% | 100% |
| 421 | G26_LA14  | <i>Enterobacter cloacae</i>         | 100% | 100% |
| 422 | G26_LA15  | <i>Enterobacter cloacae</i>         | 100% | 100% |

|     |           |                                     |      |      |
|-----|-----------|-------------------------------------|------|------|
| 423 | G26_LA16  | <i>Enterobacter cloacae</i>         | 100% | 100% |
| 424 | G26_LA17  | <i>Enterobacter cloacae</i>         | 100% | 100% |
| 425 | G26_LA18  | <i>Enterobacter cloacae</i>         | 100% | 100% |
| 426 | G26_LA21  | <i>Enterobacter cloacae</i>         | 100% | 100% |
| 427 | G28_LA1   | <i>Enterococcus faecalis</i>        | 100% | 99%  |
| 428 | G28_LA2   | <i>Lactococcus lactis</i>           | 100% | 99%  |
| 429 | G28_LA3   | <i>Lactococcus lactis</i>           | 99%  | 99%  |
| 430 | G28_LA4   | <i>Enterococcus faecalis</i>        | 100% | 99%  |
| 431 | G28_LA7   | <i>Enterococcus faecalis</i>        | 100% | 99%  |
| 432 | G28_LA9   | <i>Enterococcus faecalis</i>        | 100% | 99%  |
| 433 | G28_LA11  | <i>Citrobacter freundii</i>         | 100% | 99%  |
| 434 | G28_LA12  | <i>Enterococcus sp.</i>             | 99%  | 99%  |
| 435 | G28_LA13  | <i>Enterococcus faecalis</i>        | 100% | 99%  |
| 436 | G28_LA15  | <i>Lactococcus lactis</i>           | 99%  | 99%  |
| 437 | G28_LA17  | <i>Enterococcus sp.</i>             | 100% | 99%  |
| 438 | G28_LA19  | <i>Lactococcus lactis</i>           | 100% | 99%  |
| 439 | G28_LA20  | <i>Escherichia coli</i>             | 100% | 99%  |
| 440 | G28_LA21  | <i>Enterococcus saccharolyticus</i> | 99%  | 99%  |
| 441 | G28B_LA22 | <i>Enterococcus hirae</i>           | 100% | 99%  |
| 442 | G28B_LA23 | <i>Enterococcus hirae</i>           | 99%  | 99%  |
| 443 | G28B_LA24 | <i>Enterococcus faecalis</i>        | 99%  | 99%  |
| 444 | G28B_LA25 | <i>Enterococcus sp.</i>             | 99%  | 99%  |
| 445 | G28B_LA26 | <i>Enterococcus faecalis</i>        | 100% | 99%  |
| 446 | G28B_LA27 | <i>Enterococcus faecalis</i>        | 100% | 99%  |
| 447 | G28B_LA28 | <i>Enterococcus saccharolyticus</i> | 99%  | 99%  |
| 448 | G28B_LA29 | <i>Enterococcus sp.</i>             | 100% | 99%  |
| 449 | G28B_LA30 | <i>Enterococcus faecalis</i>        | 100% | 99%  |
| 450 | G28B_LA31 | <i>Enterococcus sp.</i>             | 99%  | 99%  |
| 451 | G28B_LA32 | <i>Enterococcus hirae</i>           | 100% | 99%  |
| 452 | G28B_LA33 | <i>Enterococcus hirae</i>           | 100% | 99%  |
| 453 | G28B_LA34 | <i>Comamonas sp.</i>                | 100% | 99%  |
| 454 | G28B_LA37 | <i>Enterobacter cancerogenus</i>    | 100% | 99%  |
| 455 | G28B_LA39 | <i>Enterococcus hirae</i>           | 99%  | 99%  |
| 456 | G28B_LA40 | <i>Escherichia coli</i>             | 100% | 99%  |
| 457 | G28B_LA41 | <i>Enterococcus hirae</i>           | 99%  | 99%  |
| 458 | G28B_LA42 | <i>Enterococcus hirae</i>           | 100% | 99%  |
| 459 | G30_LA1   | <i>Lactococcus lactis</i>           | 100% | 99%  |
| 460 | G30_LA2   | <i>Enterococcus faecalis</i>        | 99%  | 100% |
| 461 | G30_LA3   | <i>Lactococcus lactis</i>           | 99%  | 99%  |
| 462 | G30_LA4   | <i>Lactococcus lactis</i>           | 100% | 99%  |
| 463 | G30_LA5   | <i>Lactococcus lactis</i>           | 100% | 99%  |
| 464 | G30_LA7   | <i>Enterococcus hirae</i>           | 100% | 100% |
| 465 | G30_LA8   | <i>Lactococcus lactis</i>           | 100% | 99%  |
| 466 | G30_LA9   | <i>Lactococcus lactis</i>           | 100% | 99%  |
| 467 | G30_LA10  | <i>Lactococcus lactis</i>           | 100% | 99%  |
| 468 | G30_LA12  | <i>Enterococcus faecalis</i>        | 100% | 99%  |
| 469 | G30_LA13  | <i>Enterococcus faecalis</i>        | 100% | 99%  |

|     |           |                                     |      |      |
|-----|-----------|-------------------------------------|------|------|
| 470 | G30_LA14  | <i>Lactococcus lactis</i>           | 100% | 99%  |
| 471 | G30_LA15  | <i>Lactococcus lactis</i>           | 100% | 99%  |
| 472 | G30_LA16  | <i>Lactococcus lactis</i>           | 100% | 99%  |
| 473 | G30_LA17  | <i>Enterobacter cloacae</i>         | 99%  | 99%  |
| 474 | G30_LA18  | <i>Staphylococcus sciuri</i>        | 99%  | 99%  |
| 475 | G30_LA19  | <i>Staphylococcus sciuri</i>        | 99%  | 99%  |
| 476 | G30_LA20  | <i>Lactococcus lactis</i>           | 100% | 99%  |
| 477 | G30_LA21  | <i>Lactococcus lactis</i>           | 99%  | 99%  |
| 478 | G30B_LA22 | <i>Enterococcus faecalis</i>        | 100% | 99%  |
| 479 | G30B_LA23 | <i>Lactococcus lactis</i>           | 100% | 99%  |
| 480 | G30B_LA24 | <i>Enterobacter cloacae</i>         | 100% | 99%  |
| 481 | G30B_LA25 | <i>Staphylococcus sp.</i>           | 100% | 99%  |
| 482 | G30B_LA26 | <i>Staphylococcus equorum</i>       | 99%  | 99%  |
| 483 | G30B_LA28 | <i>Staphylococcus saprophyticus</i> | 100% | 100% |
| 484 | G30B_LA29 | <i>Vibrio sp.</i>                   | 100% | 95%  |
| 485 | G30B_LA31 | <i>Koukoulia aurantiaca</i>         | 100% | 99%  |
| 486 | G30B_LA32 | <i>Bacillus sp.</i>                 | 99%  | 99%  |
| 487 | G30B_LA33 | <i>Enterococcus hirae</i>           | 99%  | 99%  |
| 488 | G30B_LA37 | <i>Enterococcus hirae</i>           | 100% | 99%  |
| 489 | G30B_LA38 | <i>Lactococcus lactis</i>           | 100% | 99%  |
| 490 | G30B_LA39 | <i>Staphylococcus saprophyticus</i> | 100% | 99%  |
| 491 | G30B_LA40 | <i>Staphylococcus saprophyticus</i> | 100% | 99%  |
| 492 | G30B_LA41 | <i>Serratia marcescens</i>          | 100% | 99%  |
| 493 | G31_LA1   | <i>Serratia marcescens</i>          | 100% | 99%  |
| 494 | G31_LA2   | <i>Citrobacter koseri</i>           | 100% | 99%  |
| 495 | G31_LA3   | <i>Citrobacter koseri</i>           | 100% | 99%  |
| 496 | G31_LA4   | <i>Citrobacter freundii</i>         | 100% | 99%  |
| 497 | G31_LA5   | <i>Enterobacter sp.</i>             | 100% | 99%  |
| 498 | G31_LA7   | <i>Enterococcus hirae</i>           | 99%  | 99%  |
| 499 | G31_LA9   | <i>Klebsiella variicola</i>         | 100% | 99%  |
| 500 | G31_LA11  | <i>Citrobacter koseri</i>           | 100% | 99%  |
| 501 | G31_LA13  | <i>Lactococcus lactis</i>           | 100% | 99%  |
| 502 | G31_LA14  | <i>Lactococcus lactis</i>           | 100% | 99%  |
| 503 | G31_LA16  | <i>Enterococcus hirae</i>           | 100% | 100% |
| 504 | G31_LA17  | <i>Klebsiella variicola</i>         | 100% | 99%  |
| 505 | G31_LA18  | <i>Citrobacter koseri</i>           | 100% | 99%  |
| 506 | G31_LA19  | <i>Citrobacter murlinae</i>         | 89%  | 99%  |
| 507 | G31_LA20  | <i>Citrobacter freundii</i>         | 100% | 99%  |
| 508 | G31_LA21  | <i>Yokenella regensburgei</i>       | 99%  | 99%  |
| 509 | G31B_LA22 | <i>Enterococcus hirae</i>           | 99%  | 99%  |
| 510 | G31B_LA23 | <i>Enterococcus hirae</i>           | 100% | 99%  |
| 511 | G31B_LA24 | <i>Enterococcus hirae</i>           | 100% | 99%  |
| 512 | G31B_LA27 | <i>Enterococcus hirae</i>           | 100% | 99%  |
| 513 | G31B_LA28 | <i>Weissella confusa</i>            | 100% | 100% |
| 514 | G31B_LA29 | <i>Enterococcus hirae</i>           | 100% | 99%  |
| 515 | G31B_LA30 | <i>Citrobacter freundii</i>         | 99%  | 99%  |
| 516 | G31B_LA31 | <i>Weissella confusa</i>            | 100% | 99%  |

|     |           |                                     |      |      |
|-----|-----------|-------------------------------------|------|------|
| 517 | G31B_LA33 | <i>Weissella confusa</i>            | 100% | 100% |
| 518 | G31B_LA34 | <i>Citrobacter koseri</i>           | 100% | 99%  |
| 519 | G31B_LA35 | <i>Enterococcus hirae</i>           | 100% | 99%  |
| 520 | G31B_LA36 | <i>Citrobacter freundii</i>         | 99%  | 99%  |
| 521 | G31B_LA37 | <i>Weissella confusa</i>            | 100% | 100% |
| 522 | G31B_LA38 | <i>Citrobacter sp.</i>              | 100% | 99%  |
| 523 | G31B_LA40 | <i>Enterococcus hirae</i>           | 100% | 99%  |
| 524 | G31B_LA41 | <i>Enterobacter ludwigii</i>        | 100% | 99%  |
| 525 | BCS_LA1   | <i>Staphylococcus lentus</i>        | 100% | 99%  |
| 526 | BCS_LA2   | <i>Staphylococcus cohnii</i>        | 100% | 99%  |
| 527 | BCS_LA3   | <i>Staphylococcus lentus</i>        | 100% | 99%  |
| 528 | BCS_LA4   | <i>Staphylococcus cohnii</i>        | 100% | 100% |
| 529 | BCS_LA5   | <i>Staphylococcus nepalensis</i>    | 100% | 100% |
| 530 | BCS_LA6   | <i>Staphylococcus lentus</i>        | 100% | 99%  |
| 531 | BCS_LA7   | <i>Staphylococcus cohnii</i>        | 100% | 100% |
| 532 | BCS_LA8   | <i>Staphylococcus lentus</i>        | 100% | 99%  |
| 533 | BCS_LA9   | <i>Staphylococcus saprophyticus</i> | 100% | 100% |
| 534 | BCS_LA10  | <i>Staphylococcus lentus</i>        | 100% | 99%  |
| 535 | BCS_LA11  | <i>Staphylococcus saprophyticus</i> | 100% | 100% |
| 536 | BCS_LA12  | <i>Staphylococcus lentus</i>        | 100% | 99%  |
| 537 | BCS_LA13  | <i>Staphylococcus aureus</i>        | 100% | 100% |
| 538 | BCS_LA14  | <i>Staphylococcus lentus</i>        | 100% | 99%  |
| 539 | BCS_LA15  | <i>Staphylococcus aureus</i>        | 100% | 100% |
| 540 | BCS_LA16  | <i>Staphylococcus lentus</i>        | 100% | 99%  |
| 541 | BCS_LA17  | <i>Staphylococcus cohnii</i>        | 100% | 100% |
| 542 | BCS_LA20  | <i>Staphylococcus cohnii</i>        | 100% | 100% |
| 543 | CGS_LA1   | <i>Staphylococcus sciuri</i>        | 100% | 100% |
| 544 | CGS_LA2   | <i>Staphylococcus sciuri</i>        | 100% | 100% |
| 545 | CGS_LA3   | <i>Staphylococcus sciuri</i>        | 100% | 99%  |
| 546 | CGS_LA4   | <i>Staphylococcus sciuri</i>        | 100% | 99%  |
| 547 | CGS_LA5   | <i>Enterobacter ludwigii</i>        | 100% | 99%  |
| 548 | CGS_LA6   | <i>Staphylococcus saprophyticus</i> | 100% | 100% |
| 549 | CGS_LA7   | <i>Citrobacter koseri</i>           | 99%  | 99%  |
| 550 | CGS_LA8   | <i>Staphylococcus sciuri</i>        | 100% | 99%  |
| 551 | CGS_LA9   | <i>Staphylococcus sciuri</i>        | 100% | 99%  |
| 552 | CGS_LA10  | <i>Citrobacter koseri</i>           | 100% | 99%  |
| 553 | CGS_LA11  | <i>Enterobacter ludwigii</i>        | 100% | 99%  |
| 554 | CGS_LA12  | <i>Staphylococcus sciuri</i>        | 100% | 99%  |
| 555 | CGS_LA13  | <i>Staphylococcus sciuri</i>        | 99%  | 100% |
| 556 | CGS_LA14  | <i>Staphylococcus lentus</i>        | 100% | 99%  |
| 557 | CGS_LA15  | <i>Staphylococcus sciuri</i>        | 100% | 99%  |
| 558 | CGS_LA16  | <i>Staphylococcus sciuri</i>        | 100% | 99%  |
| 559 | CGS_LA17  | <i>Staphylococcus sciuri</i>        | 100% | 100% |
| 560 | CGS_LA18  | <i>Staphylococcus saprophyticus</i> | 100% | 99%  |
| 561 | CGS_LA19  | <i>Staphylococcus sciuri</i>        | 100% | 100% |
| 562 | CGS_LA21  | <i>Enterobacter sp.</i>             | 100% | 99%  |
| 563 | CW_LA1    | <i>Klebsiella oxytoca</i>           | 100% | 99%  |

|     |          |                                   |      |      |
|-----|----------|-----------------------------------|------|------|
| 564 | CW_LA2   | <i>Klebsiella oxytoca</i>         | 100% | 99%  |
| 565 | CW_LA3   | <i>Klebsiella oxytoca</i>         | 100% | 99%  |
| 566 | CW_LA5   | <i>Klebsiella sp.</i>             | 100% | 99%  |
| 567 | CW_LA7   | <i>Cedecea davisae</i>            | 100% | 99%  |
| 568 | CW_LA8   | <i>Enterobacter sp.</i>           | 100% | 99%  |
| 569 | CW_LA9   | <i>Pantoea agglomerans</i>        | 99%  | 99%  |
| 570 | CW_LA10  | <i>Klebsiella sp.</i>             | 100% | 99%  |
| 571 | CW_LA11  | <i>Klebsiella sp.</i>             | 99%  | 99%  |
| 572 | CW_LA12  | <i>Klebsiella oxytoca</i>         | 100% | 99%  |
| 573 | CW_LA13  | <i>Klebsiella sp.</i>             | 100% | 99%  |
| 574 | CW_LA14  | <i>Klebsiella sp.</i>             | 99%  | 99%  |
| 575 | CW_LA15  | <i>Klebsiella oxytoca</i>         | 100% | 99%  |
| 576 | G2_STR1  | <i>Acinetobacter bouvetii</i>     | 99   | 100  |
| 577 | G2_STR2  | <i>Acinetobacter gandensis</i>    | 99%  | 98%  |
| 578 | G2_STR5  | <i>Acinetobacter johnsonii</i>    | 100  | 99   |
| 579 | G2_STR6  | <i>Acinetobacter haemolyticus</i> | 100% | 99%  |
| 580 | G2_STR7  | <i>Acinetobacter bouvetii</i>     | 100  | 98%  |
| 581 | G2_STR8  | <i>Acinetobacter gandensis</i>    | 99%  | 98%  |
| 582 | G2_STR9  | <i>Acinetobacter haemolyticus</i> | 100% | 99%  |
| 583 | G3_STR1  | <i>Escherichia coli</i>           | 100  | 100% |
| 584 | G3_STR2  | <i>Escherichia coli</i>           | 100  | 100  |
| 585 | G3_STR3  | <i>Escherichia coli</i>           | 100  | 99   |
| 586 | G3_STR4  | <i>Escherichia coli</i>           | 100  | 99   |
| 587 | G3_STR5  | <i>Escherichia coli</i>           | 99   | 100  |
| 588 | G3_STR6  | <i>Escherichia coli</i>           | 100  | 100  |
| 589 | G3_STR7  | <i>Escherichia sp.</i>            | 98   | 99   |
| 590 | G3_STR9  | <i>Klebsiella oxytoca</i>         | 100  | 99   |
| 591 | G3_STR10 | <i>Escherichia coli</i>           | 100% | 99%  |
| 592 | G3_STR11 | <i>Escherichia coli</i>           | 99%  | 100% |
| 593 | G3_STR12 | <i>Escherichia coli</i>           | 99   | 100  |
| 594 | G3_STR13 | <i>Escherichia coli</i>           | 100  | 99   |
| 595 | G3_STR14 | <i>Escherichia coli</i>           | 100% | 99%  |
| 596 | G3_STR15 | <i>Escherichia coli</i>           | 100% | 100% |
| 597 | G3_STR16 | <i>Escherichia coli</i>           | 100% | 100% |
| 598 | G3_STR17 | <i>Klebsiella oxytoca</i>         | 100  | 99   |
| 599 | G3_STR18 | <i>Escherichia coli</i>           | 99%  | 99   |
| 600 | G3_STR19 | <i>Escherichia coli</i>           | 99%  | 99%  |
| 601 | G3_STR20 | <i>Escherichia coli</i>           | 100  | 100  |
| 602 | G7_STR1  | <i>Citrobacter murliniae</i>      | 98   | 99   |
| 603 | G7_STR2  | <i>Enterobacter cloacae</i>       | 100  | 99   |
| 604 | G7_STR3  | <i>Enterobacter cloacae</i>       | 98%  | 99%  |
| 605 | G7_STR4  | <i>Citrobacter murliniae</i>      | 99   | 99   |
| 606 | G7_STR5  | <i>Citrobacter murliniae</i>      | 98   | 99   |
| 607 | G7_STR6  | <i>Citrobacter murliniae</i>      | 98   | 100  |
| 608 | G7_STR7  | <i>Citrobacter murliniae</i>      | 98   | 99   |
| 609 | G7_STR8  | <i>Enterobacter cloacae</i>       | 99   | 99   |
| 610 | G7_STR9  | <i>Enterobacter cloacae</i>       | 99%  | 99%  |

|     |          |                                   |      |     |
|-----|----------|-----------------------------------|------|-----|
| 611 | G7_STR10 | <i>Enterobacter cloacae</i>       | 100% | 99% |
| 612 | G7_STR11 | <i>Enterobacter cloacae</i>       | 98%  | 99% |
| 613 | G7_STR12 | <i>Citrobacter murliniae</i>      | 100  | 99  |
| 614 | G7_STR14 | <i>Enterobacter cloacae</i>       | 100% | 99% |
| 615 | G7_STR15 | <i>Acinetobacter johnsonii</i>    | 99%  | 97% |
| 616 | G7_STR16 | <i>Enterobacter cloacae</i>       | 99%  | 99% |
| 617 | G7_STR17 | <i>Enterobacter cloacae</i>       | 100% | 99% |
| 618 | G7_STR19 | <i>Enterobacter cloacae</i>       | 100% | 99% |
| 619 | G7_STR20 | <i>Citrobacter murliniae</i>      | 100  | 99% |
| 620 | G7_STR21 | <i>Citrobacter murliniae</i>      | 100  | 99% |
| 621 | G8_STR1  | <i>Enterobacter cloacae</i>       | 100  | 98% |
| 622 | G8_STR2  | <i>Citrobacter koseri</i>         | 100  | 99  |
| 623 | G8_STR3  | <i>Escherichia coli</i>           | 100  | 99  |
| 624 | G8_STR4  | <i>Escherichia coli</i>           | 99   | 99  |
| 625 | G8_STR5  | <i>Citrobacter koseri</i>         | 99   | 99  |
| 626 | G8_STR6  | <i>Escherichia coli</i>           | 99   | 99  |
| 627 | G8_STR9  | <i>Escherichia coli</i>           | 100  | 99  |
| 628 | G8_STR10 | <i>Escherichia coli</i>           | 100  | 99  |
| 629 | G8_STR11 | <i>Citrobacter koseri</i>         | 100  | 99  |
| 630 | G8_STR12 | <i>Enterobacter asburiae</i>      | 100  | 99  |
| 631 | G8_STR13 | <i>Escherichia coli</i>           | 100  | 100 |
| 632 | G8_STR14 | <i>Escherichia coli</i>           | 100  | 100 |
| 633 | G8_STR15 | <i>Citrobacter koseri</i>         | 100  | 99  |
| 634 | G8_STR16 | <i>Enterobacter asburiae</i>      | 100  | 100 |
| 635 | G8_STR17 | <i>Escherichia coli</i>           | 100  | 100 |
| 636 | G8_STR18 | <i>Enterobacter asburiae</i>      | 100  | 99  |
| 637 | G8_STR19 | <i>Enterobacter asburiae</i>      | 100  | 99  |
| 638 | G8_STR20 | <i>Escherichia coli</i>           | 100  | 100 |
| 639 | G8_STR21 | <i>Enterobacter ludwigii</i>      | 100  | 99  |
| 640 | G9_STR1  | <i>Klebsiella oxytoca</i>         | 99%  | 99% |
| 641 | G9_STR3  | <i>Klebsiella oxytoca</i>         | 100% | 99% |
| 642 | G9_STR5  | <i>Klebsiella oxytoca</i>         | 100  | 99  |
| 643 | G9_STR8  | <i>Citrobacter koseri</i>         | 100  | 99  |
| 644 | G9_STR9  | <i>Citrobacter koseri</i>         | 100  | 99  |
| 645 | G9_STR11 | <i>Citrobacter koseri</i>         | 100  | 99  |
| 646 | G9_STR12 | <i>Klebsiella oxytoca</i>         | 100  | 99  |
| 647 | G15_STR2 | <i>Acinetobacter haemolyticus</i> | 100  | 99  |
| 648 | G15_STR3 | <i>Enterobacter cloacae</i>       | 100  | 99  |
| 649 | G15_STR4 | <i>Acinetobacter haemolyticus</i> | 100  | 99  |
| 650 | G15_STR5 | <i>Acinetobacter haemolyticus</i> | 100  | 99  |
| 651 | G17_STR1 | <i>Serratia ureilytica</i>        | 100  | 99  |
| 652 | G17_STR2 | <i>Serratia ureilytica</i>        | 100  | 99  |
| 653 | G17_STR3 | <i>Serratia ureilytica</i>        | 100  | 100 |
| 654 | G17_STR4 | <i>Serratia marcescens</i>        | 100  | 99  |
| 655 | G17_STR5 | <i>Serratia marcescens</i>        | 100% | 99% |
| 656 | G17_STR6 | <i>Serratia marcescens</i>        | 100  | 99  |
| 657 | G17_STR7 | <i>Serratia marcescens</i>        | 100  | 100 |

|     |           |                                   |      |      |
|-----|-----------|-----------------------------------|------|------|
| 658 | G17_STR8  | <i>Serratia ureilytica</i>        | 100  | 99   |
| 659 | G17_STR9  | <i>Serratia marcescens</i>        | 100  | 99   |
| 660 | G17_ST10  | <i>Serratia ureilytica</i>        | 100  | 100  |
| 661 | G17_ST11  | <i>Serratia marcescens</i>        | 100  | 100  |
| 662 | G17_ST12  | <i>Serratia marcescens</i>        | 100% | 99%  |
| 663 | G17_ST13  | <i>Serratia ureilytica</i>        | 100  | 99   |
| 664 | G17_ST14  | <i>Serratia marcescens</i>        | 100  | 99   |
| 665 | G17_ST16  | <i>Serratia marcescens</i>        | 100% | 99%  |
| 666 | G19_STR1  | <i>Klebsiella pneumoniae</i>      | 100  | 99   |
| 667 | G19_STR2  | <i>Enterobacter cloacae</i>       | 100% | 99%  |
| 668 | G19_STR3  | <i>Acinetobacter sp.</i>          | 100  | 99   |
| 669 | G19_STR4  | <i>Enterobacter cloacae</i>       | 100% | 99%  |
| 670 | G19_STR5  | <i>Acinetobacter lwoffii</i>      | 100% | 99%  |
| 671 | G19_STR6  | <i>Pseudomonas putida</i>         | 100  | 100  |
| 672 | G19_STR7  | <i>Acinetobacter johnsonii</i>    | 100% | 99%  |
| 673 | G19_STR8  | <i>Enterobacter cancerogenus</i>  | 99   | 99   |
| 674 | G19_STR9  | <i>Acinetobacter haemolyticus</i> | 100  | 99   |
| 675 | G19_STR10 | <i>Acinetobacter haemolyticus</i> | 100  | 99   |
| 676 | G19_STR11 | <i>Enterobacter ludwigii</i>      | 100  | 100  |
| 677 | G19_STR12 | <i>Leclercia adecarboxylata</i>   | 100  | 100  |
| 678 | G19_STR13 | <i>Acinetobacter haemolyticus</i> | 100  | 99   |
| 679 | G19_STR15 | <i>Klebsiella pneumoniae</i>      | 100  | 100  |
| 680 | G19_STR16 | <i>Enterobacter cloacae</i>       | 100% | 99%  |
| 681 | G19_STR17 | <i>Leclercia adecarboxylata</i>   | 100  | 99   |
| 682 | G19_STR19 | <i>Serratia marcescens</i>        | 100  | 99   |
| 683 | G19_STR20 | <i>Citrobacter freundii</i>       | 100  | 99   |
| 684 | G19_STR21 | <i>Klebsiella oxytoca</i>         | 100  | 99   |
| 685 | G20_STR1  | <i>Paracoccus alcaliphilus</i>    | 100  | 99   |
| 686 | G20_STR2  | <i>Paracoccus alcaliphilus</i>    | 100  | 99   |
| 687 | G20_STR3  | <i>Paracoccus alcaliphilus</i>    | 100  | 99   |
| 688 | G20_STR5  | <i>Paracoccus alcaliphilus</i>    | 100  | 99   |
| 689 | G20_STR7  | <i>Paracoccus alcaliphilus</i>    | 100  | 99   |
| 690 | G20_STR8  | <i>Paracoccus alcaliphilus</i>    | 100  | 99   |
| 691 | G20_STR9  | <i>Paracoccus alcaliphilus</i>    | 100  | 99   |
| 692 | G20_STR11 | <i>Citrobacter koseri</i>         | 100  | 99   |
| 693 | G20_STR12 | <i>Brevibacterium epidermidis</i> | 100  | 99   |
| 694 | G23_STR1  | <i>Enterobacter asburiae</i>      | 100  | 99   |
| 695 | G23_STR2  | <i>Klebsiella oxytoca</i>         | 99%  | 99%  |
| 696 | G23_STR3  | <i>Enterobacter asburiae</i>      | 99   | 99   |
| 697 | G23_STR4  | <i>Enterobacter asburiae</i>      | 99%  | 99%  |
| 698 | G23_STR5  | <i>Enterobacter asburiae</i>      | 100  | 99   |
| 699 | G23_STR6  | <i>Citrobacter koseri</i>         | 99   | 99   |
| 700 | G23_STR7  | <i>Klebsiella oxytoca</i>         | 100% | 100% |
| 701 | G23_STR8  | <i>Enterobacter asburiae</i>      | 100  | 100  |
| 702 | G23_STR9  | <i>Enterobacter asburiae</i>      | 100  | 99   |
| 703 | G23_STR11 | <i>Enterobacter asburiae</i>      | 99   | 99   |
| 704 | G23_STR12 | <i>Enterobacter asburiae</i>      | 100  | 99   |



|     |           |                                   |      |     |
|-----|-----------|-----------------------------------|------|-----|
| 705 | G23_STR13 | <i>Enterobacter asburiae</i>      | 100  | 99  |
| 706 | G23_STR14 | <i>Enterobacter asburiae</i>      | 100  | 100 |
| 707 | G23_STR15 | <i>Enterobacter asburiae</i>      | 100  | 99  |
| 708 | G23_STR16 | <i>Enterobacter asburiae</i>      | 100  | 99  |
| 709 | G23_STR17 | <i>Enterobacter asburiae</i>      | 100  | 99  |
| 710 | G23_STR18 | <i>Enterobacter asburiae</i>      | 100  | 99  |
| 711 | G23_STR19 | <i>Enterobacter asburiae</i>      | 100  | 100 |
| 712 | G23_STR20 | <i>Enterobacter asburiae</i>      | 100  | 99  |
| 713 | G26_STR1  | <i>Citrobacter freundii</i>       | 100  | 99  |
| 714 | G26_STR2  | <i>Enterobacter cloacae</i>       | 99   | 99  |
| 715 | G26_STR3  | <i>Citrobacter freundii</i>       | 100  | 100 |
| 716 | G26_STR4  | <i>Enterobacter cloacae</i>       | 100  | 100 |
| 717 | G26_STR5  | <i>Enterobacter cloacae</i>       | 100  | 100 |
| 718 | G26_STR6  | <i>Enterobacter cloacae</i>       | 100  | 100 |
| 719 | G26_STR7  | <i>Enterobacter cloacae</i>       | 100  | 100 |
| 720 | G26_STR8  | <i>Enterobacter cloacae</i>       | 99   | 99  |
| 721 | G26_STR9  | <i>Enterobacter cloacae</i>       | 100  | 100 |
| 722 | G26_STR10 | <i>Citrobacter freundii</i>       | 100  | 99  |
| 723 | G26_STR11 | <i>Enterobacter cloacae</i>       | 100  | 100 |
| 724 | G26_STR12 | <i>Citrobacter freundii</i>       | 100  | 99  |
| 725 | G26_STR13 | <i>Enterobacter cloacae</i>       | 100  | 99  |
| 726 | G26_STR14 | <i>Enterobacter cloacae</i>       | 99   | 99  |
| 727 | G26_STR15 | <i>Enterobacter cloacae</i>       | 100  | 99  |
| 728 | G26_STR16 | <i>Enterobacter cloacae</i>       | 100  | 99  |
| 729 | G26_STR17 | <i>Enterobacter cloacae</i>       | 100  | 100 |
| 730 | G26_STR18 | <i>Enterobacter cloacae</i>       | 100  | 99  |
| 731 | G26_STR19 | <i>Enterobacter cloacae</i>       | 100  | 99  |
| 732 | G26_STR20 | <i>Enterobacter cloacae</i>       | 100  | 99  |
| 733 | G26_STR21 | <i>Enterobacter cloacae</i>       | 100  | 100 |
| 734 | G28_STR2  | <i>Enterobacter ludwigii</i>      | 100  | 99  |
| 735 | G28_STR3  | <i>Acinetobacter haemolyticus</i> | 100  | 99  |
| 736 | G28_STR5  | <i>Raoultella ornithinolytica</i> | 100  | 99  |
| 737 | G28_STR6  | <i>Escherichia coli</i>           | 100  | 100 |
| 738 | G28_STR7  | <i>Escherichia coli</i>           | 100  | 99  |
| 739 | G28_STR9  | <i>Enterobacter asburiae</i>      | 100  | 100 |
| 740 | G28_STR10 | <i>Klebsiella oxytoca</i>         | 100% | 99% |
| 741 | G28_STR11 | <i>Escherichia coli</i>           | 100  | 99  |
| 742 | G28_STR12 | <i>Klebsiella oxytoca</i>         | 100% | 99% |
| 743 | G28_STR13 | <i>Enterobacter cloacae</i>       | 100% | 99% |
| 744 | G28_STR15 | <i>Escherichia coli</i>           | 100  | 99  |
| 745 | G28_STR18 | <i>Raoultella ornithinolytica</i> | 100  | 99  |
| 746 | G28_STR19 | <i>Acinetobacter haemolyticus</i> | 100  | 99  |
| 747 | G28_STR20 | <i>Escherichia coli</i>           | 100  | 99  |
| 748 | G28_STR21 | <i>Pseudomonas putida</i>         | 100  | 99  |
| 749 | G30_STR1  | <i>Escherichia coli</i>           | 100  | 99  |
| 750 | G30_STR5  | <i>Arthrobacter arilaitensis</i>  | 100% | 98% |
| 751 | G30_STR6  | <i>Enterobacter asburiae</i>      | 100  | 99  |

|     |           |                                   |      |      |
|-----|-----------|-----------------------------------|------|------|
| 752 | G30_STR7  | <i>Acinetobacter haemolyticus</i> | 100  | 99   |
| 753 | G30_STR11 | <i>Serratia marcescens</i>        | 100  | 99   |
| 754 | G30_STR16 | <i>Enterobacter ludwigii</i>      | 100  | 99   |
| 755 | G30_STR17 | <i>Acinetobacter junii</i>        | 100  | 99   |
| 756 | G31_STR1  | <i>Enterobacter cloacae</i>       | 99   | 99   |
| 757 | G31_STR2  | <i>Enterobacter sp.</i>           | 100% | 99%  |
| 758 | G31_STR5  | <i>Klebsiella variicola</i>       | 100  | 99   |
| 759 | G31_STR7  | <i>Citrobacter koseri</i>         | 99   | 99   |
| 760 | G31_STR8  | <i>Enterobacter ludwigii</i>      | 100  | 99   |
| 761 | G31_STR9  | <i>Enterobacter hormaechei</i>    | 100% | 99%  |
| 762 | G31_STR11 | <i>Enterobacter sp.</i>           | 100% | 99%  |
| 763 | G31_STR13 | <i>Enterobacter ludwigii</i>      | 100  | 99   |
| 764 | G31_STR14 | <i>Enterobacter cancerogenus</i>  | 100  | 99   |
| 765 | G31_STR15 | <i>Klebsiella variicola</i>       | 100  | 99   |
| 766 | G31_STR16 | <i>Enterobacter asburiae</i>      | 99   | 100  |
| 767 | G31_STR20 | <i>Klebsiella oxytoca</i>         | 100  | 99   |
| 768 | CGS_STR2  | <i>Enterobacter cloacae</i>       | 100% | 100% |
| 769 | CGS_STR3  | <i>Enterobacter asburiae</i>      | 100  | 99   |
| 770 | CGS_STR4  | <i>Enterobacter asburiae</i>      | 100  | 99   |
| 771 | CGS_STR5  | <i>Enterobacter cloacae</i>       | 100% | 100% |
| 772 | CGS_STR7  | <i>Enterobacter cloacae</i>       | 100% | 99%  |
| 773 | CGS_STR10 | <i>Enterobacter asburiae</i>      | 100  | 99   |
| 774 | CGS_STR12 | <i>Enterobacter asburiae</i>      | 100  | 98   |
| 775 | CGS_STR13 | <i>Enterobacter cloacae</i>       | 100% | 99%  |
| 776 | CGS_STR15 | <i>Enterobacter asburiae</i>      | 100  | 99   |
| 777 | CGS_STR16 | <i>Enterobacter ludwigii</i>      | 100  | 99   |
| 778 | CGS_STR17 | <i>Enterobacter cloacae</i>       | 100  | 99   |
| 779 | CGS_STR18 | <i>Enterobacter cloacae</i>       | 100% | 100% |
| 780 | CGS_STR19 | <i>Enterobacter asburiae</i>      | 100  | 99   |
| 781 | CGS_STR20 | <i>Citrobacter koseri</i>         | 99   | 99   |
| 782 | CW_STR_1  | <i>Aquitalea denitrificans</i>    | 99%  | 98%  |
| 783 | CW_STR_3  | <i>Aquitalea sp.</i>              | 100% | 99%  |
| 784 | CW_STR5   | <i>Enterobacter cancerogenus</i>  | 100  | 99   |
| 785 | CW_STR6   | <i>Enterobacter cloacae</i>       | 100  | 99   |
| 786 | CW_STR7   | <i>Aquitalea magnusonii</i>       | 100  | 99   |
| 787 | G2_ZM1    | <i>Lactococcus lactis</i>         | 100% | 99%  |
| 788 | G2_ZM2    | <i>Lactococcus lactis</i>         | 100% | 99%  |
| 789 | G2_ZM3    | <i>Lactococcus lactis</i>         | 100% | 99%  |
| 790 | G2_ZM4    | <i>Acinetobacter haemolyticus</i> | 100% | 99%  |
| 791 | G2_ZM5    | <i>Acinetobacter guillouiae</i>   | 99%  | 98%  |
| 792 | G2_ZM6    | <i>Acinetobacter guillouiae</i>   | 100% | 99%  |
| 793 | G2_ZM7    | <i>Brevibacterium oceanii</i>     | 100% | 99%  |
| 794 | G3_ZM1    | <i>Escherichia fergusonii</i>     | 100% | 99%  |
| 795 | G3_ZM2    | <i>Escherichia fergusonii</i>     | 100% | 99%  |
| 796 | G3_ZM3    | <i>Enterobacter soli</i>          | 100% | 99%  |
| 797 | G3_ZM4    | <i>Escherichia coli</i>           | 100% | 99%  |
| 798 | G3_ZM5    | <i>Escherichia fergusonii</i>     | 99%  | 99%  |

|     |         |                                   |      |      |
|-----|---------|-----------------------------------|------|------|
| 799 | G3_ZM6  | <i>Escherichia coli</i>           | 99%  | 99%  |
| 800 | G3_ZM7  | <i>Escherichia coli</i>           | 99%  | 99%  |
| 801 | G3_ZM8  | <i>Escherichia coli</i>           | 100% | 99%  |
| 802 | G3_ZM9  | <i>Escherichia fergusonii</i>     | 99%  | 99%  |
| 803 | G3_ZM10 | <i>Escherichia fergusonii</i>     | 100% | 99%  |
| 804 | G3_ZM11 | <i>Escherichia fergusonii</i>     | 100% | 99%  |
| 805 | G3_ZM12 | <i>Escherichia fergusonii</i>     | 100% | 99%  |
| 806 | G3_ZM13 | <i>Escherichia fergusonii</i>     | 100% | 99%  |
| 807 | G3_ZM14 | <i>Acinetobacter haemolyticus</i> | 98%  | 97%  |
| 808 | G3_ZM15 | <i>Escherichia coli</i>           | 100% | 99%  |
| 809 | G3_ZM16 | <i>Escherichia coli</i>           | 98%  | 99%  |
| 810 | G3_ZM17 | <i>Escherichia coli</i>           | 99%  | 99%  |
| 811 | G3_ZM18 | <i>Escherichia coli</i>           | 99%  | 99%  |
| 812 | G3_ZM19 | <i>Escherichia fergusonii</i>     | 100% | 99%  |
| 813 | G3_ZM20 | <i>Escherichia coli</i>           | 99%  | 99%  |
| 814 | G3_ZM21 | <i>Escherichia fergusonii</i>     | 99%  | 99%  |
| 815 | G6_ZM1  | <i>Enterococcus hirae</i>         | 99%  | 99%  |
| 816 | G6_ZM2  | <i>Enterococcus hirae</i>         | 99%  | 99%  |
| 817 | G6_ZM3  | <i>Enterococcus hirae</i>         | 99%  | 99%  |
| 818 | G6_ZM4  | <i>Enterococcus hirae</i>         | 99%  | 99%  |
| 819 | G6_ZM5  | <i>Enterococcus hirae</i>         | 99%  | 99%  |
| 820 | G6_ZM6  | <i>Enterococcus hirae</i>         | 98%  | 99%  |
| 821 | G6_ZM7  | <i>Enterococcus hirae</i>         | 99%  | 99%  |
| 822 | G6_ZM8  | <i>Enterococcus hirae</i>         | 100% | 100% |
| 823 | G6_ZM9  | <i>Enterococcus hirae</i>         | 100% | 99%  |
| 824 | G6_ZM11 | <i>Enterococcus hirae</i>         | 99%  | 99%  |
| 825 | G6_ZM12 | <i>Enterococcus hirae</i>         | 99%  | 99%  |
| 826 | G6_ZM13 | <i>Enterococcus hirae</i>         | 99%  | 99%  |
| 827 | G6_ZM14 | <i>Enterococcus hirae</i>         | 99%  | 99%  |
| 828 | G6_ZM15 | <i>Enterococcus hirae</i>         | 99%  | 99%  |
| 829 | G6_ZM17 | <i>Enterococcus hirae</i>         | 99%  | 99%  |
| 830 | G6_ZM18 | <i>Enterococcus hirae</i>         | 99%  | 99%  |
| 831 | G6_ZM19 | <i>Enterococcus hirae</i>         | 99%  | 99%  |
| 832 | G7_ZM1  | <i>Arthrobacter protophormiae</i> | 99%  | 99%  |
| 833 | G7_ZM2  | <i>Citrobacter murlinae</i>       | 98%  | 99%  |
| 834 | G7_ZM3  | <i>Arthrobacter soli</i>          | 98%  | 99%  |
| 835 | G7_ZM4  | <i>Enterobacter ludwigii</i>      | 99%  | 98%  |
| 836 | G7_ZM5  | <i>Arthrobacter soli</i>          | 98%  | 99%  |
| 837 | G7_ZM6  | <i>Arthrobacter soli</i>          | 98%  | 99%  |
| 838 | G7_ZM7  | <i>Enterococcus faecalis</i>      | 98%  | 99%  |
| 839 | G7_ZM9  | <i>Arthrobacter soli</i>          | 99%  | 99%  |
| 840 | G7_ZM10 | <i>Enterobacter ludwigii</i>      | 99%  | 99%  |
| 841 | G7_ZM11 | <i>Aerococcus viridans</i>        | 99%  | 99%  |
| 842 | G7_ZM12 | <i>Citrobacter freundii</i>       | 100% | 99%  |
| 843 | G7_ZM13 | <i>Enterobacter ludwigii</i>      | 99%  | 98%  |
| 844 | G7_ZM14 | <i>Acinetobacter johnsonii</i>    | 99%  | 97%  |
| 845 | G7_ZM15 | <i>Aerococcus viridans</i>        | 99%  | 99%  |

|     |          |                                   |      |      |
|-----|----------|-----------------------------------|------|------|
| 846 | G7_ZM17  | <i>Arthrobacter soli</i>          | 99%  | 99%  |
| 847 | G7_ZM18  | <i>Enterobacter ludwigii</i>      | 100% | 99%  |
| 848 | G7_ZM19  | <i>Acinetobacter johnsonii</i>    | 100% | 97%  |
| 849 | G7_ZM20  | <i>Enterococcus faecalis</i>      | 100% | 99%  |
| 850 | G7_ZM21  | <i>Enterobacter ludwigii</i>      | 100% | 99%  |
| 851 | G8_ZM1   | <i>Enterobacter cloacae</i>       | 100% | 99%  |
| 852 | G8_ZM2   | <i>Staphylococcus kloosii</i>     | 99%  | 99%  |
| 853 | G8_ZM3   | <i>Escherichia coli</i>           | 99%  | 99%  |
| 854 | G8_ZM4   | <i>Escherichia coli</i>           | 100% | 99%  |
| 855 | G8_ZM5   | <i>Enterobacter asburiae</i>      | 100% | 99%  |
| 856 | G8_ZM6   | <i>Enterobacter cloacae</i>       | 100% | 99%  |
| 857 | G8_ZM7   | <i>Escherichia coli</i>           | 100% | 99%  |
| 858 | G8_ZM8   | <i>Escherichia coli</i>           | 100% | 100% |
| 859 | G8_ZM9   | <i>Escherichia coli</i>           | 100% | 99%  |
| 860 | G8_ZM10  | <i>Escherichia coli</i>           | 99%  | 99%  |
| 861 | G8_ZM13  | <i>Enterobacter cloacae</i>       | 100% | 99%  |
| 862 | G8_ZM14  | <i>Escherichia coli</i>           | 100% | 99%  |
| 863 | G8_ZM15  | <i>Escherichia coli</i>           | 99%  | 99%  |
| 864 | G8_ZM16  | <i>Enterobacter asburiae</i>      | 99%  | 99%  |
| 865 | G8_ZM17  | <i>Staphylococcus nepalensis</i>  | 99%  | 99%  |
| 866 | G8_ZM18  | <i>Escherichia coli</i>           | 99%  | 99%  |
| 867 | G8_ZM20  | <i>Enterobacter asburiae</i>      | 100% | 99%  |
| 868 | G9_ZM1   | <i>Enterococcus hirae</i>         | 99%  | 99%  |
| 869 | G9_ZM2   | <i>Citrobacter koseri</i>         | 100% | 99%  |
| 870 | G9_ZM3   | <i>Enterococcus hirae</i>         | 99%  | 99%  |
| 871 | G9_ZM5   | <i>Citrobacter koseri</i>         | 99%  | 99%  |
| 872 | G9_ZM6   | <i>Citrobacter koseri</i>         | 99%  | 99%  |
| 873 | G9_ZM7   | <i>Klebsiella oxytoca</i>         | 100% | 99%  |
| 874 | G15_ZM1  | <i>Pseudomonas composti</i>       | 99%  | 99%  |
| 875 | G15_ZM2  | <i>Enterobacter asburiae</i>      | 99%  | 99%  |
| 876 | G15_ZM4  | <i>Acinetobacter haemolyticus</i> | 99%  | 99%  |
| 877 | G15_ZM5  | <i>Acinetobacter johnsonii</i>    | 100% | 99%  |
| 878 | G15_ZM6  | <i>Enterococcus faecalis</i>      | 100% | 100% |
| 879 | G15_ZM7  | <i>Escherichia fergusonii</i>     | 99%  | 99%  |
| 880 | G15_ZM8  | <i>Citrobacter freundii</i>       | 99%  | 99%  |
| 881 | G15_ZM9  | <i>Staphylococcus kloosii</i>     | 99%  | 99%  |
| 882 | G17_ZM2  | <i>Lactococcus lactis</i>         | 99%  | 99%  |
| 883 | G17_ZM3  | <i>Serratia nematodiphila</i>     | 99%  | 99%  |
| 884 | G17_ZM4  | <i>Staphylococcus lentus</i>      | 99%  | 99%  |
| 885 | G17_ZM5  | <i>Serratia nematodiphila</i>     | 99%  | 99%  |
| 886 | G17_ZM6  | <i>Serratia ureilytica</i>        | 100% | 99%  |
| 887 | G17_ZM7  | <i>Lactococcus lactis</i>         | 100% | 100% |
| 888 | G17_ZM8  | <i>Serratia ureilytica</i>        | 100% | 99%  |
| 889 | G17_ZM9  | <i>Serratia ureilytica</i>        | 100% | 100% |
| 890 | G17_ZM10 | <i>Serratia marcescens</i>        | 100% | 100% |
| 891 | G17_ZM11 | <i>Serratia ureilytica</i>        | 100% | 100% |
| 892 | G17_ZM12 | <i>Staphylococcus lentus</i>      | 99%  | 99%  |

|     |          |                                          |      |      |
|-----|----------|------------------------------------------|------|------|
| 893 | G19_ZM1  | <i>Enterobacter ludwigii</i>             | 100% | 99%  |
| 894 | G19_ZM4  | <i>Kurthia gibsonii</i>                  | 100% | 99%  |
| 895 | G19_ZM7  | <i>Acinetobacter haemolyticus</i>        | 99%  | 99%  |
| 896 | G19_ZM8  | <i>Klebsiella variicola</i>              | 99%  | 99%  |
| 897 | G19_ZM10 | <i>Escherichia coli</i>                  | 99%  | 100% |
| 898 | G19_ZM11 | <i>Arthrobacter protophormiae</i>        | 99%  | 99%  |
| 899 | G19_ZM13 | <i>Providencia alcalifaciens</i>         | 100% | 99%  |
| 900 | G19_ZM15 | <i>Yersinia massiliensis</i>             | 100% | 99%  |
| 901 | G19_ZM16 | <i>Providencia alcalifaciens</i>         | 100% | 99%  |
| 902 | G19_ZM17 | <i>Proteus mirabilis</i>                 | 100% | 100% |
| 903 | G19_ZM18 | <i>Klebsiella oxytoca</i>                | 99%  | 100% |
| 904 | G19_ZM19 | <i>Enterococcus faecalis</i>             | 99%  | 99%  |
| 905 | G19_ZM20 | <i>Serratia nematodiphila</i>            | 100% | 99%  |
| 906 | G20_ZM1  | <i>Brevibacterium epidermidis</i>        | 99%  | 99%  |
| 907 | G20_ZM2  | <i>Brachybacterium paraconglomeratum</i> | 100% | 99%  |
| 908 | G20_ZM3  | <i>Brachybacterium paraconglomeratum</i> | 100% | 99%  |
| 909 | G20_ZM4  | <i>Serratia marcescens</i>               | 100% | 99%  |
| 910 | G20_ZM5  | <i>Lactococcus lactis</i>                | 99%  | 99%  |
| 911 | G20_ZM6  | <i>Aerococcus viridans</i>               | 100% | 99%  |
| 912 | G20_ZM7  | <i>Paracoccus alcaliphilus</i>           | 100% | 99%  |
| 913 | G20_ZM8  | <i>Brachybacterium paraconglomeratum</i> | 99%  | 99%  |
| 914 | G20_ZM9  | <i>Microbacterium amylolyticum</i>       | 98%  | 98%  |
| 915 | G20_ZM10 | <i>Brachybacterium paraconglomeratum</i> | 100% | 99%  |
| 916 | G20_ZM11 | <i>Aerococcus urinaeequi</i>             | 100% | 99%  |
| 917 | G20_ZM12 | <i>Lactococcus lactis</i>                | 100% | 99%  |
| 918 | G20_ZM13 | <i>Brachybacterium paraconglomeratum</i> | 100% | 99%  |
| 919 | G20_ZM14 | <i>Brachybacterium paraconglomeratum</i> | 99%  | 99%  |
| 920 | G20_ZM16 | <i>Brachybacterium paraconglomeratum</i> | 99%  | 99%  |
| 921 | G20_ZM18 | <i>Brachybacterium paraconglomeratum</i> | 100% | 99%  |
| 922 | G20_ZM19 | <i>Brachybacterium paraconglomeratum</i> | 100% | 99%  |
| 923 | G20_ZM21 | <i>Lactococcus lactis</i>                | 100% | 99%  |
| 924 | G21_ZM1  | <i>Escherichia fergusonii</i>            | 99%  | 99%  |
| 925 | G21_ZM2  | <i>Escherichia coli</i>                  | 99%  | 99%  |
| 926 | G21_ZM3  | <i>Escherichia fergusonii</i>            | 99%  | 99%  |
| 927 | G21_ZM4  | <i>Escherichia coli</i>                  | 100% | 99%  |
| 928 | G21_ZM5  | <i>Escherichia fergusonii</i>            | 99%  | 99%  |
| 929 | G21_ZM6  | <i>Escherichia coli</i>                  | 100% | 99%  |
| 930 | G21_ZM7  | <i>Escherichia coli</i>                  | 99%  | 99%  |
| 931 | G21_ZM8  | <i>Escherichia coli</i>                  | 99%  | 99%  |
| 932 | G21_ZM9  | <i>Escherichia coli</i>                  | 99%  | 99%  |
| 933 | G23_ZM2  | <i>Citrobacter freundii</i>              | 99%  | 99%  |
| 934 | G23_ZM3  | <i>Enterobacter asburiae</i>             | 99%  | 99%  |
| 935 | G23_ZM4  | <i>Citrobacter freundii</i>              | 99%  | 99%  |
| 936 | G23_ZM5  | <i>Citrobacter freundii</i>              | 100% | 99%  |
| 937 | G23_ZM6  | <i>Enterobacter ludwigii</i>             | 100% | 99%  |
| 938 | G23_ZM7  | <i>Enterobacter mori</i>                 | 100% | 99%  |
| 939 | G23_ZM8  | <i>Enterobacter asburiae</i>             | 100% | 99%  |

|     |           |                                   |      |      |
|-----|-----------|-----------------------------------|------|------|
| 940 | G23_ZM9   | <i>Citrobacter koseri</i>         | 99%  | 99%  |
| 941 | G23_ZM10  | <i>Citrobacter freundii</i>       | 99%  | 99%  |
| 942 | G23_ZM11  | <i>Citrobacter freundii</i>       | 100% | 99%  |
| 943 | G23_ZM12  | <i>Staphylococcus lentus</i>      | 100% | 100% |
| 944 | G23_ZM14  | <i>Citrobacter freundii</i>       | 100% | 99%  |
| 945 | G23_ZM15  | <i>Citrobacter koseri</i>         | 100% | 99%  |
| 946 | G23_ZM17  | <i>Enterococcus faecalis</i>      | 100% | 99%  |
| 947 | G23_ZM18  | <i>Citrobacter freundii</i>       | 100% | 99%  |
| 948 | G25_ZM2   | <i>Staphylococcus lentus</i>      | 100% | 99%  |
| 949 | G25_ZM3   | <i>Staphylococcus lentus</i>      | 99%  | 99%  |
| 950 | G25_ZM4   | <i>Staphylococcus lentus</i>      | 99%  | 99%  |
| 951 | G25_ZM9   | <i>Enterococcus faecalis</i>      | 100% | 99%  |
| 952 | G25_ZM10B | <i>Enterococcus faecalis</i>      | 99%  | 99%  |
| 953 | G25_ZM11B | <i>Enterococcus hirae</i>         | 99%  | 99%  |
| 954 | G25_ZM14  | <i>Staphylococcus cohnii</i>      | 99%  | 99%  |
| 955 | G25_ZM17B | <i>Staphylococcus lentus</i>      | 99%  | 99%  |
| 956 | G25_ZM20B | <i>Staphylococcus lentus</i>      | 99%  | 98%  |
| 957 | G25_ZM21B | <i>Staphylococcus cohnii</i>      | 98%  | 99%  |
| 958 | G25_ZM22B | <i>Corynebacterium glutamicum</i> | 99%  | 97%  |
| 959 | G25_ZM24B | <i>Staphylococcus lentus</i>      | 100% | 99%  |
| 960 | G26_ZM1   | <i>Enterobacter cloacae</i>       | 99%  | 99%  |
| 961 | G26_ZM2   | <i>Enterobacter cloacae</i>       | 99%  | 99%  |
| 962 | G26_ZM3   | <i>Enterobacter cloacae</i>       | 99%  | 99%  |
| 963 | G26_ZM4   | <i>Enterobacter cloacae</i>       | 99%  | 99%  |
| 964 | G26_ZM5   | <i>Enterobacter cloacae</i>       | 98%  | 100% |
| 965 | G26_ZM6   | <i>Enterobacter cloacae</i>       | 99%  | 99%  |
| 966 | G26_ZM7   | <i>Enterobacter cloacae</i>       | 99%  | 99%  |
| 967 | G26_ZM8   | <i>Enterobacter cloacae</i>       | 99%  | 99%  |
| 968 | G26_ZM9   | <i>Enterobacter cloacae</i>       | 99%  | 99%  |
| 969 | G26_ZM10  | <i>Enterobacter cloacae</i>       | 100% | 99%  |
| 970 | G26_ZM11  | <i>Enterobacter cloacae</i>       | 100% | 99%  |
| 971 | G26_ZM12  | <i>Enterobacter cloacae</i>       | 99%  | 99%  |
| 972 | G26_ZM13  | <i>Enterobacter ludwigii</i>      | 99%  | 99%  |
| 973 | G26_ZM14  | <i>Enterobacter cloacae</i>       | 99%  | 99%  |
| 974 | G26_ZM15  | <i>Enterobacter cloacae</i>       | 99%  | 99%  |
| 975 | G26_ZM16  | <i>Enterobacter ludwigii</i>      | 98%  | 99%  |
| 976 | G26_ZM17  | <i>Enterobacter cloacae</i>       | 99%  | 99%  |
| 977 | G26_ZM18  | <i>Enterobacter cloacae</i>       | 99%  | 99%  |
| 978 | G26_ZM19  | <i>Enterobacter cloacae</i>       | 100% | 99%  |
| 979 | G26_ZM20  | <i>Enterobacter cloacae</i>       | 100% | 99%  |
| 980 | G26_ZM21  | <i>Enterobacter cloacae</i>       | 99%  | 99%  |
| 981 | G28_ZM1   | <i>Escherichia coli</i>           | 100% | 99%  |
| 982 | G28_ZM3   | <i>Enterococcus faecalis</i>      | 99%  | 99%  |
| 983 | G28_ZM4   | <i>Enterococcus faecalis</i>      | 99%  | 99%  |
| 984 | G28_ZM5   | <i>Enterococcus faecalis</i>      | 99%  | 99%  |
| 985 | G28_ZM7   | <i>Enterococcus casseliflavus</i> | 100% | 99%  |
| 986 | G28_ZM8   | <i>Enterococcus faecalis</i>      | 99%  | 99%  |

|      |          |                                          |      |      |
|------|----------|------------------------------------------|------|------|
| 987  | G28_ZM9  | <i>Lactococcus lactis</i>                | 99%  | 99%  |
| 988  | G28_ZM11 | <i>Enterococcus hirae</i>                | 99%  | 99%  |
| 989  | G28_ZM12 | <i>Lactococcus lactis</i>                | 99%  | 99%  |
| 990  | G28_ZM13 | <i>Escherichia coli</i>                  | 99%  | 99%  |
| 991  | G28_ZM15 | <i>Lactococcus lactis</i>                | 99%  | 99%  |
| 992  | G28_ZM16 | <i>Enterococcus faecalis</i>             | 100% | 100% |
| 993  | G28_ZM17 | <i>Enterococcus saccharolyticus</i>      | 100% | 99%  |
| 994  | G28_ZM18 | <i>Escherichia coli</i>                  | 100% | 99%  |
| 995  | G28_ZM19 | <i>Enterococcus hirae</i>                | 100% | 100% |
| 996  | G28_ZM21 | <i>Enterococcus hirae</i>                | 100% | 99%  |
| 997  | G30_ZM1  | <i>Enterococcus faecalis</i>             | 100% | 99%  |
| 998  | G30_ZM2  | <i>Enterococcus faecalis</i>             | 99%  | 100% |
| 999  | G30_ZM3  | <i>Advenella mimigardefordensis</i>      | 100% | 99%  |
| 1000 | G30_ZM4  | <i>Lactococcus lactis</i>                | 100% | 100% |
| 1001 | G30_ZM6  | <i>Lactococcus lactis</i>                | 100% | 99%  |
| 1002 | G30_ZM7  | <i>Staphylococcus aureus</i>             | 100% | 99%  |
| 1003 | G30_ZM8  | <i>Lactococcus lactis</i>                | 100% | 100% |
| 1004 | G30_ZM9  | <i>Lactococcus lactis</i>                | 100% | 99%  |
| 1005 | G30_ZM10 | <i>Staphylococcus equorum</i>            | 99%  | 99%  |
| 1006 | G30_ZM11 | <i>Serratia marcescens</i>               | 99%  | 99%  |
| 1007 | G30_ZM12 | <i>Staphylococcus equorum</i>            | 99%  | 99%  |
| 1008 | G30_ZM13 | <i>Lactococcus lactis</i>                | 99%  | 99%  |
| 1009 | G30_ZM17 | <i>Kurthia huakuii</i>                   | 100% | 99%  |
| 1010 | G30_ZM18 | <i>Staphylococcus aureus</i>             | 99%  | 99%  |
| 1011 | G30_ZM19 | <i>Brachybacterium paraconglomeratum</i> | 100% | 99%  |
| 1012 | G30_ZM21 | <i>Staphylococcus equorum</i>            | 100% | 99%  |
| 1013 | G31_ZM1  | <i>Klebsiella variicola</i>              | 99%  | 100% |
| 1014 | G31_ZM2  | <i>Enterococcus hirae</i>                | 100% | 99%  |
| 1015 | G31_ZM4  | <i>Lactococcus lactis</i>                | 100% | 99%  |
| 1016 | G31_ZM6  | <i>Enterococcus hirae</i>                | 99%  | 99%  |
| 1017 | G31_ZM7  | <i>Enterococcus hirae</i>                | 100% | 99%  |
| 1018 | G31_ZM8  | <i>Enterococcus hirae</i>                | 100% | 99%  |
| 1019 | G31_ZM9  | <i>Enterococcus hirae</i>                | 100% | 99%  |
| 1020 | G31_ZM10 | <i>Enterobacter hormaechei</i>           | 100% | 99%  |
| 1021 | G31_ZM12 | <i>Enterococcus hirae</i>                | 99%  | 99%  |
| 1022 | G31_ZM14 | <i>Lactococcus lactis</i>                | 99%  | 99%  |
| 1023 | G31_ZM16 | <i>Citrobacter freundii</i>              | 100% | 99%  |
| 1024 | G31_ZM17 | <i>Enterococcus hirae</i>                | 100% | 99%  |
| 1025 | G31_ZM18 | <i>Citrobacter freundii</i>              | 99%  | 99%  |
| 1026 | G31_ZM20 | <i>Citrobacter koseri</i>                | 99%  | 99%  |
| 1027 | BCS_ZM2  | <i>Staphylococcus nepalensis</i>         | 100% | 100% |
| 1028 | BCS_ZM3  | <i>Staphylococcus lentus</i>             | 100% | 99%  |
| 1029 | BCS_ZM4  | <i>Staphylococcus cohnii</i>             | 100% | 100% |
| 1030 | BCS_ZM5  | <i>Staphylococcus lentus</i>             | 100% | 99%  |
| 1031 | BCS_ZM6  | <i>Staphylococcus nepalensis</i>         | 99%  | 100% |
| 1032 | BCS_ZM7  | <i>Staphylococcus nepalensis</i>         | 100% | 100% |
| 1033 | BCS_ZM8  | <i>Staphylococcus cohnii</i>             | 99%  | 100% |

|      |          |                                     |      |      |
|------|----------|-------------------------------------|------|------|
| 1034 | BCS_ZM9  | <i>Staphylococcus cohnii</i>        | 100% | 99%  |
| 1035 | BCS_ZM10 | <i>Staphylococcus lentus</i>        | 99%  | 99%  |
| 1036 | BCS_ZM11 | <i>Staphylococcus lentus</i>        | 99%  | 99%  |
| 1037 | BCS_ZM12 | <i>Staphylococcus cohnii</i>        | 100% | 99%  |
| 1038 | BCS_ZM13 | <i>Staphylococcus cohnii</i>        | 100% | 99%  |
| 1039 | BCS_ZM14 | <i>Staphylococcus lentus</i>        | 99%  | 99%  |
| 1040 | BCS_ZM15 | <i>Staphylococcus lentus</i>        | 100% | 99%  |
| 1041 | BCS_ZM16 | <i>Staphylococcus nepalensis</i>    | 100% | 100% |
| 1042 | BCS_ZM17 | <i>Staphylococcus lentus</i>        | 100% | 99%  |
| 1043 | BCS_ZM18 | <i>Staphylococcus lentus</i>        | 100% | 99%  |
| 1044 | BCS_ZM19 | <i>Staphylococcus nepalensis</i>    | 100% | 99%  |
| 1045 | BCS_ZM20 | <i>Staphylococcus aureus</i>        | 100% | 99%  |
| 1046 | BCS_ZM21 | <i>Staphylococcus lentus</i>        | 99%  | 99%  |
| 1047 | CGS_ZM1  | <i>Staphylococcus saprophyticus</i> | 100% | 100% |
| 1048 | CGS_ZM2  | <i>Staphylococcus sciuri</i>        | 100% | 100% |
| 1049 | CGS_ZM3  | <i>Staphylococcus lentus</i>        | 100% | 99%  |
| 1050 | CGS_ZM4  | <i>Staphylococcus lentus</i>        | 99%  | 99%  |
| 1051 | CGS_ZM5  | <i>Staphylococcus sciuri</i>        | 100% | 99%  |
| 1052 | CGS_ZM6  | <i>Staphylococcus lentus</i>        | 99%  | 99%  |
| 1053 | CGS_ZM8  | <i>Staphylococcus sciuri</i>        | 100% | 99%  |
| 1054 | CGS_ZM9  | <i>Staphylococcus sciuri</i>        | 99%  | 99%  |
| 1055 | CGS_ZM10 | <i>Staphylococcus sciuri</i>        | 100% | 99%  |
| 1056 | CGS_ZM11 | <i>Staphylococcus sciuri</i>        | 100% | 100% |
| 1057 | CGS_ZM12 | <i>Staphylococcus sciuri</i>        | 100% | 99%  |
| 1058 | CGS_ZM14 | <i>Staphylococcus lentus</i>        | 99%  | 99%  |
| 1059 | CGS_ZM15 | <i>Staphylococcus sciuri</i>        | 99%  | 100% |
| 1060 | CGS_ZM16 | <i>Staphylococcus sciuri</i>        | 100% | 99%  |
| 1061 | CGS_ZM18 | <i>Staphylococcus sciuri</i>        | 100% | 99%  |
| 1062 | CGS_ZM19 | <i>Staphylococcus sciuri</i>        | 100% | 99%  |
| 1063 | CGS_ZM21 | <i>Staphylococcus sciuri</i>        | 100% | 99%  |
| 1064 | CW_ZM1   | <i>Enterococcus faecalis</i>        | 100% | 99%  |
| 1065 | CW_ZM3   | <i>Enterococcus faecalis</i>        | 99%  | 99%  |
