# Supplementary material for: Microbiome analysis reveals the abundance of bacterial pathogens in Rousettus leschenaultii guano
Source: PubMed Central journal article supplement (PMC5109407; doi:10.1038/srep36948), 2016-11-15
Supplement: srep36948-s2.pdf [file srep36948-s2.pdf]

**Title: Microbiome analysis reveals the abundance of bacterial pathogens in  
*Rousettus leschenaultii* guano**

Sunil Banskar <sup>1</sup>, Shrikant S. Bhute <sup>2</sup>, Mangesh V. Suryavanshi <sup>1</sup>, Sachin Punekar <sup>3</sup>

Yogesh S. Shouche <sup>1\*</sup>

**Author Affiliations:**

<sup>1</sup> Microbial Culture Collection, National Centre for Cell Science, Pune, India.

<sup>2</sup> Savitribai Phule Pune University, Pune, India.

<sup>3</sup> Biosphere, Eshwari, 52/403, Lakshminagar, Parvati, Pune-411009 (Maharashtra), India.

\* Correspondence:

**Dr. Yogesh S. Shouche**

Microbial Culture Collection

National Centre for Cell Science,

Central Tower, Sai Trinity Building Garware Circle,

Sutarwadi, Pashan Pune, Maharashtra 411021, India

Fax No: +91-20-25329001

Telephone No: +91-20-25329000

Email: [yogesh@nccs.res.in](mailto:yogesh@nccs.res.in)

Supplementary Table-S1. Supplementary Table-S1.pdf file attached separately

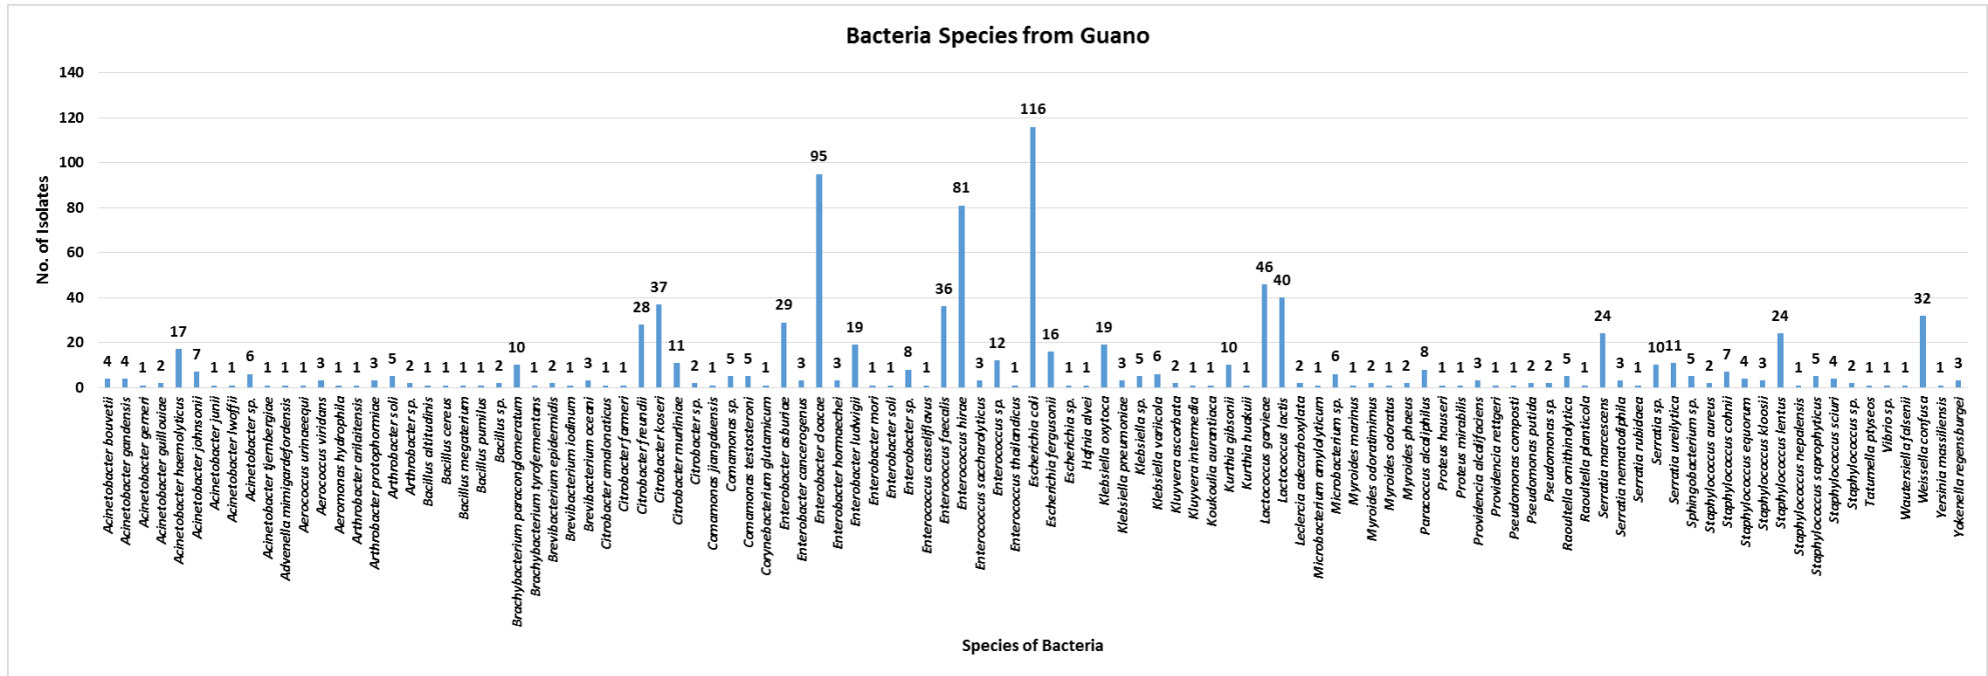

Supplementary Figure-S2. The different bacterial species isolated from the bat guano.

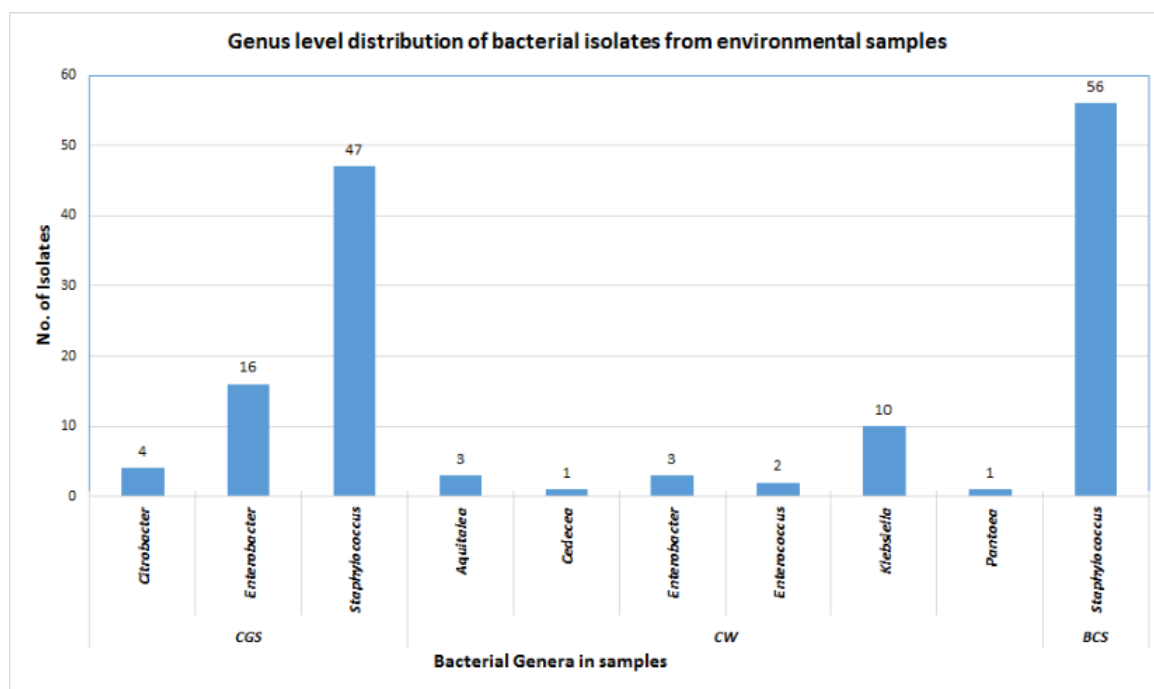

**Supplementary Figure-S3.** The bacterial genera obtained from the cave environment. A single bacterial genus *i.e.* *Staphylococcus* was obtained from BCS sample.

**Supplementary Table-S4:** The list of primers used for the identification of *E. coli* pathotypes.

| Sr. No. | virulence gene | Primer name | DNA Sequence (5' to 3')     | Pathotype | Pathogenity type            | Description                   |
|---------|----------------|-------------|-----------------------------|-----------|-----------------------------|-------------------------------|
| 1       | <i>hlyA</i>    | hly-F       | AACAAGGATAAGCACTGTTCTGGCT   | ExPEC     | extraintestinal (ExPEC)     | Alpha-Hemolysin               |
|         |                | hly-R       | ACCATATAAGCGGTCATTCCCGTCA   |           |                             | Invasion of brain endothelium |
| 2       | <i>ibeA</i>    | ibe10-F     | AGGCAGGTGTGCGCCGCGTAC       | EaggEC    | entero-aggregative (EaggEC) | heat-stable enterotoxin       |
|         |                | ibe10-R     | TGGTGCTCCGGCAAACCATGC       |           |                             |                               |
| 3       | <i>east1</i>   | east 11a    | CCATCAACACAGTATATCCGA       | EHEC      | enterohemorrhagic (EHEC)    | Shiga toxin-1                 |
|         |                | east 11b    | GGTCGCGAGTGACGGCTTTGT       |           |                             | Shiga toxin-2                 |
| 4       | <i>stx1</i>    | stx1-F      | ATAAATCGCCTATCGTTGACTAC     | EIEC      | enteroinvasive (EIEC),      | Invasion Plasmid antigen      |
|         |                | stx1-R      | AGAACGCCCACTGAGATCATC       |           |                             |                               |
| 5       | <i>stx2</i>    | stx2-F      | GGCACTGTCTGAAACTGCTCC       | ETEC      | enterotoxigenic (ETEC)      | Heat stable toxin-b           |
|         |                | stx2-R      | TCGCCAGTTATCTGACATTCTG      |           |                             | Heat stable toxin-a           |
| 6       | <i>ipah</i>    | ipaHIII     | GTTCTTGACCGCCTTTCCGATACCGTC | ETEC      | enterotoxigenic (ETEC)      | Heat stable toxin-b           |
|         |                | ipaHIV      | GCCGGTCAGCCACCCTCTGAGATAC   |           |                             | Heat stable toxin-a           |
| 7       | <i>estII</i>   | STb-2       | ATCGCATTTCTTCTTGATC         | ETEC      | enterotoxigenic (ETEC)      | Heat stable toxin-b           |
|         |                | STb-2       | GGGCGCCAAAGCATGCTCC         |           |                             | Heat stable toxin-a           |
| 8       | <i>estI</i>    | STa1        | TCTTTCCCCTCTTTTAGTCAG       | ETEC      | enterotoxigenic (ETEC)      | Heat stable toxin-b           |
|         |                | STa1        | ACAGGCAGGATTACAACAAG        |           |                             | Heat stable toxin-a           |

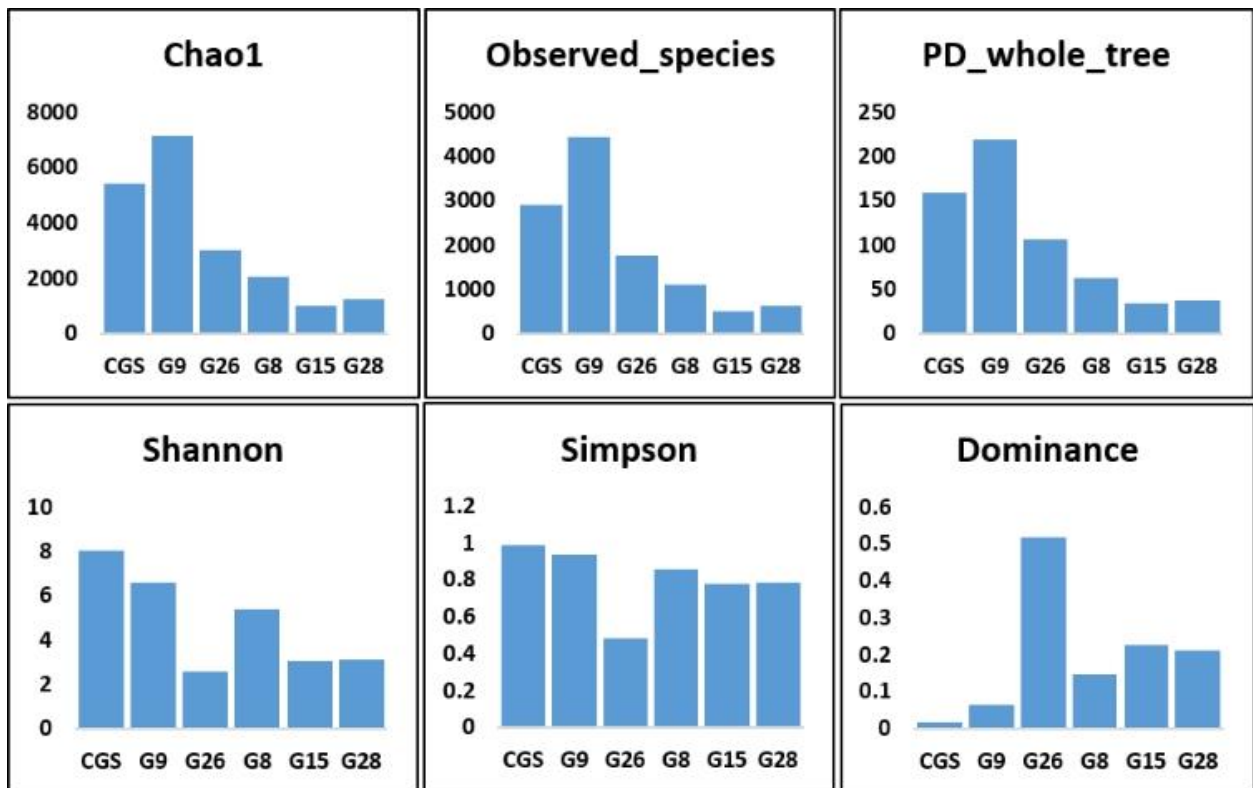

**Supplementary Figure-S5.** The alpha diversity indices showing the diversity of bacterial communities in different guano samples and a composite (decaying) guano *i.e.* CGS.

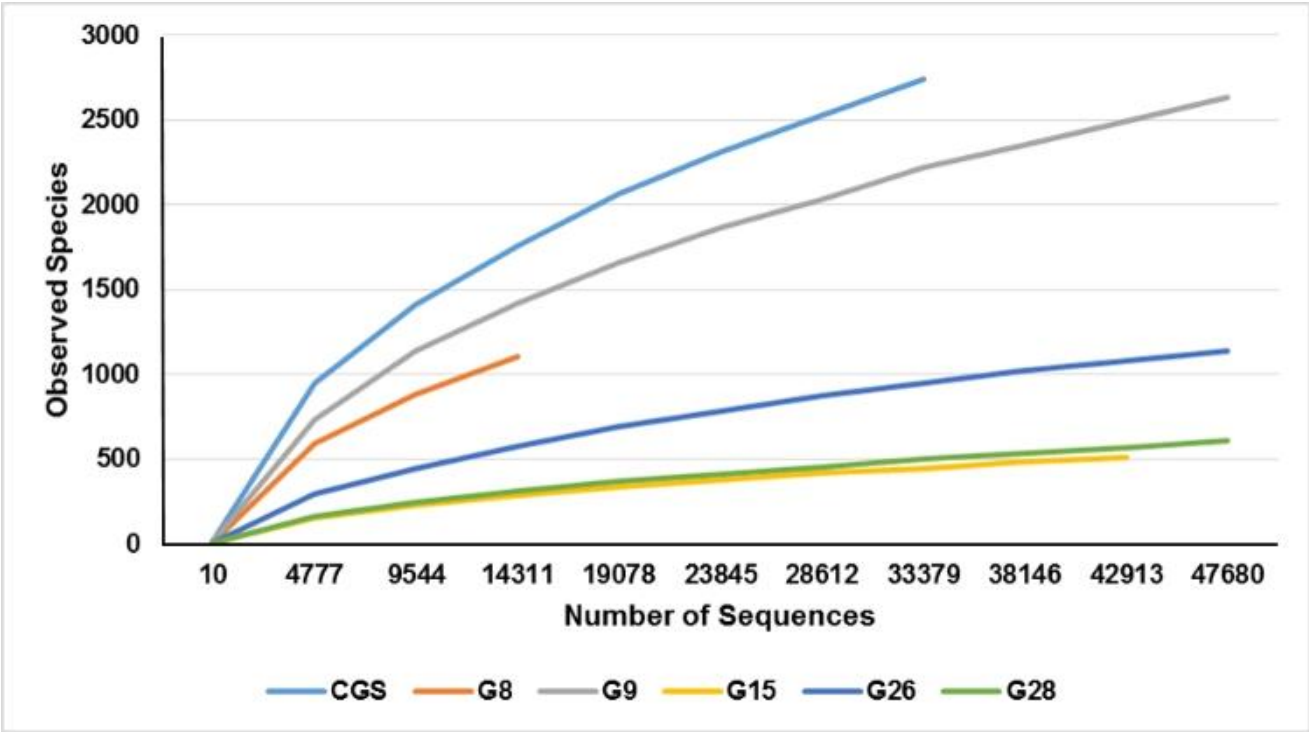

**Supplementary Figure-S6.** The rarefaction curve between observed OTUs (Operational Taxonomic Units) and number of Ion Torrent sequence.

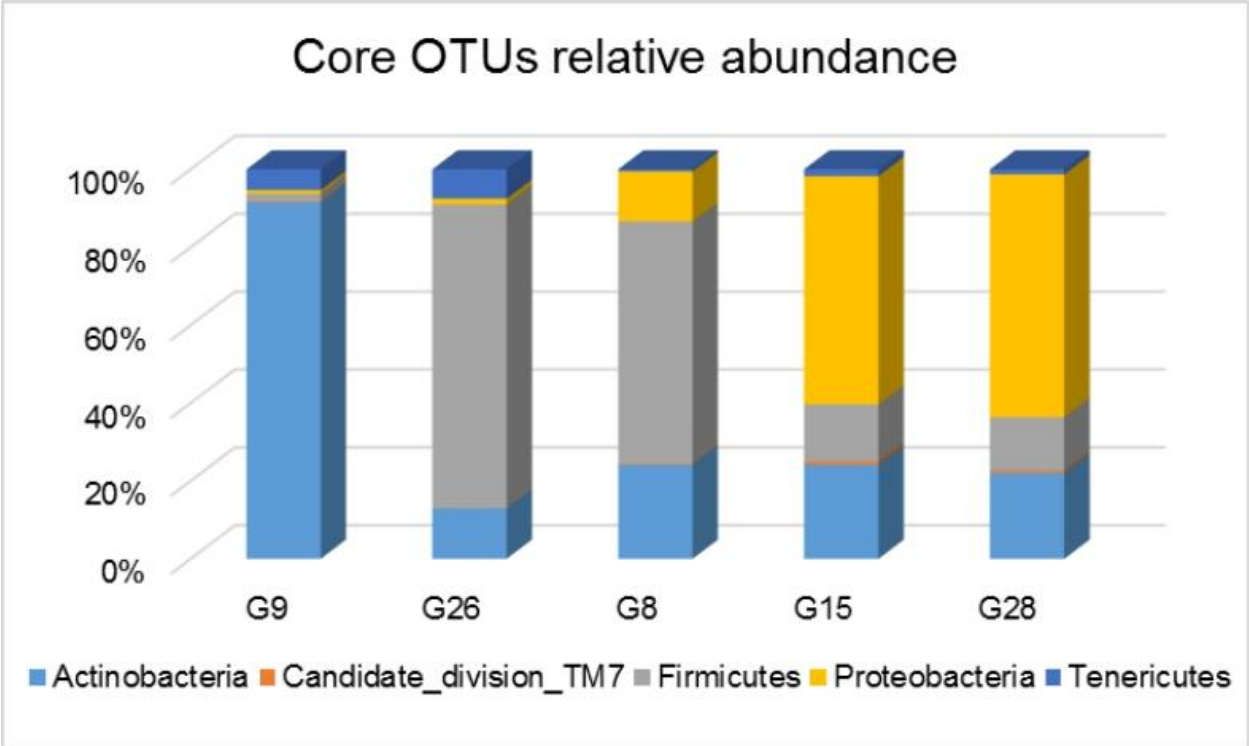

**Supplementary Figure-S7.** Relative proportions of different bacterial phyla constituting the 'core microbiome'.

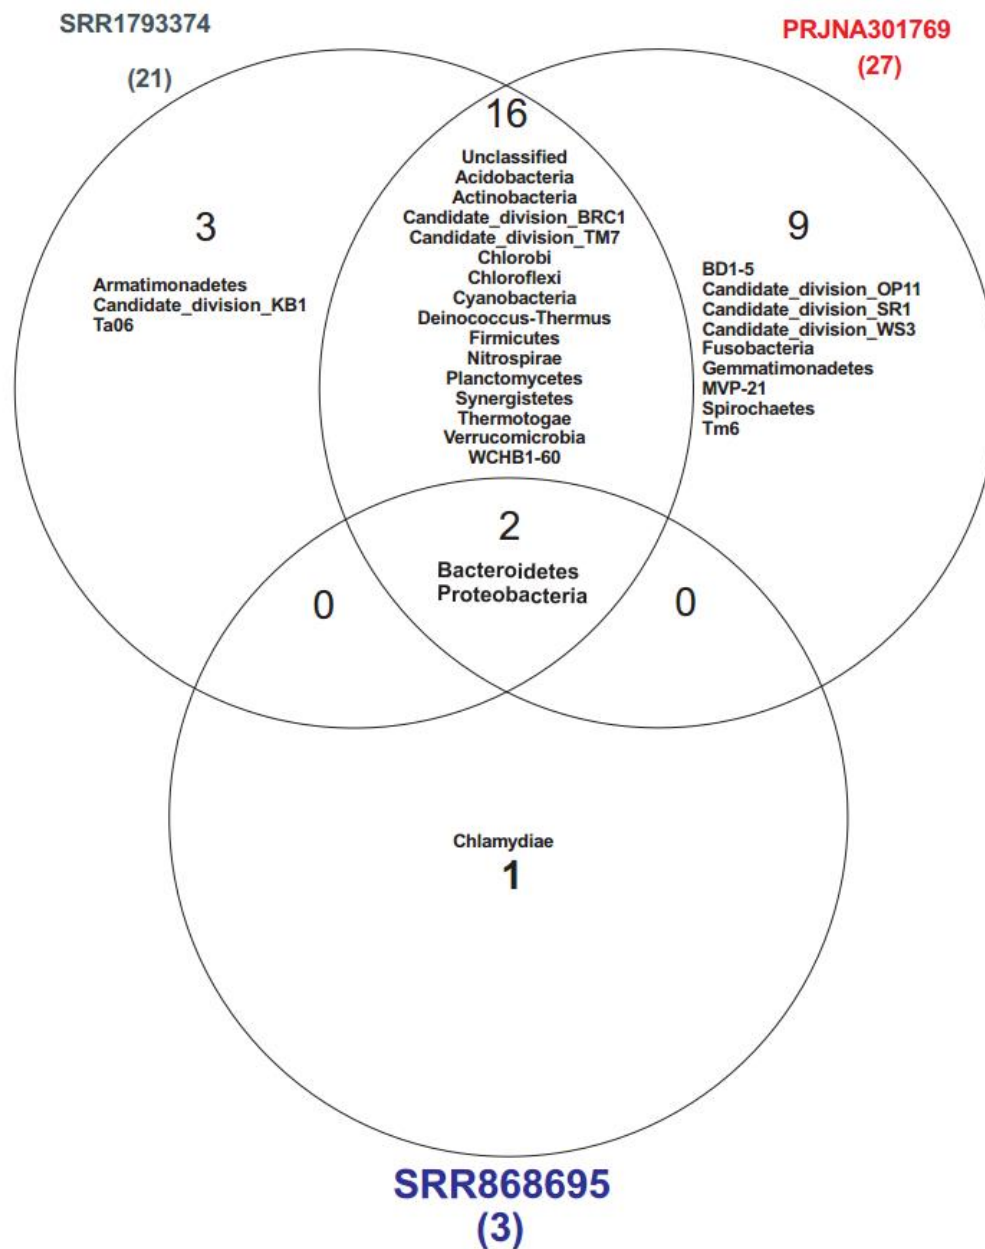

**Supplementary Figure-8.** The common bacterial phyla obtained in the comparison of three studies. SRR1793374 = DeMandal et.al.,2015; PRJNA301769 = This Study; SRR868695 = Veikkolainen et.al.,2014.
